# Supplementary material for: A series of new star-shaped or branched platinum–acetylide derivatives: synthesis, characterization, and their aggregation behavior
Source: Royal Society of Chemistry journal article supplement (doi:10.1039/c3cc42689k), 2013-01-01
Supplement: c3cc42689k.pdf [file c3cc42689k.pdf]

## Electronic Supplementary Information (ESI) For

### **A series of new star-shaped or branched platinum acetylide derivatives: synthesis, characterization, and their self-assembly behavior†**

**Bo Jiang<sup>ab‡</sup>, Li-Jun Chen<sup>a‡</sup>, Lin Xu<sup>a</sup>, Shun-Ying Liu<sup>\*b</sup>, Hai-Bo Yang<sup>\*a</sup>**

<sup>a</sup> *Shanghai Key Laboratory of Green Chemistry and Chemical Processes, Department of Chemistry, East China Normal University, 3663 N. Zhongshan Road Shanghai, 200062, P.R. China.*

<sup>b</sup> *Shanghai Engineering Research Center for Molecular Therapeutics and New Drug Discovery and Development, East China Normal University, 3663 N. Zhongshan Road Shanghai, 200062, P.R. China.*

#### **Table of Contents:**

|                                                                                                                                     |     |
|-------------------------------------------------------------------------------------------------------------------------------------|-----|
| 1. General Information.....                                                                                                         | S3  |
| 2. Synthetic Experimental Details of New Platinum-Acetylide Complexes <b>1a–b</b> and <b>2a–b</b> .....                             | S4  |
| 3. Characterization of Complexes <b>1a–b</b> and <b>2a–b</b> .....                                                                  | S9  |
| 4. UV-vis and Fluorescence Spectra of <b>1a–b</b> and <b>2a–b</b> .....                                                             | S11 |
| 5. Additional SEM Images of Complexes <b>1a</b> and <b>2a</b> at Different Scales. ....                                             | S13 |
| 6. Concentration-Dependent and Temperature-Dependent <sup>1</sup> H NMR Spectra of Complexes <b>1a</b> and <b>2a</b> . ....         | S14 |
| 7. Gelation Tests. ....                                                                                                             | S18 |
| 8. Multiple Nuclear NMR ( <sup>1</sup> H, <sup>31</sup> P, and <sup>13</sup> C NMR) Spectra and MALDI-TOF MS of New Compounds. .... | S20 |
| 9. References.....                                                                                                                  | S34 |



## 1. General Information.

$^1\text{H}$  NMR,  $^{13}\text{C}$  NMR and  $^{31}\text{P}$  NMR spectra were recorded on 400 MHz Spectrometer ( $^1\text{H}$ : 400 MHz;  $^{13}\text{C}$ : 100 MHz;  $^{31}\text{P}$ : 161.9 MHz) at 298 K. The  $^1\text{H}$  and  $^{13}\text{C}$  NMR chemical shifts are reported relative to residual solvent signals, and  $^{31}\text{P}$  NMR resonances are referenced to a internal standard sample of 85%  $\text{H}_3\text{PO}_4$  ( $\delta$  0.0). Coupling constants ( $J$ ) are denoted in Hz and chemical shifts ( $\delta$ ) in ppm. Multiplicities are denoted as follows: s = singlet, d = doublet, m = multiplet, br = broad. UV-Vis spectra were recorded on a Cary 50Bio UV-Visible spectrophotometer. Fluorescence spectra were measured on a Cary Eclipse fluorescence spectrophotometer. Samples for absorption and emission measurements were contained in 1 cm  $\times$  1 cm or 1 cm  $\times$  0.2 cm quartz cuvettes. SEM images were obtained using an S-4800 (Hitachi Ltd.) with an accelerating voltage of 10.0 kV. Samples were prepared by evaporating a solution of molecules **1a-b** and **2a-b** onto a  $\text{SiO}_2/\text{Si}$  substrate (1  $\times$  1  $\text{cm}^2$ ).

## 2. Synthetic Experimental Details of New Platinum-Acetylide

### Complexes 1a–b and 2a–b.

**Materials and Reagents.** All solvents were dried according to standard procedures and all of them were degassed under N<sub>2</sub> for 30 minutes before use. Reagents were used as purchased. All reactions were performed in standard glassware under an inert N<sub>2</sub> atmosphere. Compounds **3**<sup>1</sup>, **5**<sup>2</sup>, **7**<sup>3</sup>, and **8**<sup>4</sup> were prepared as previous report.

**Scheme S1.** Synthesis route of the precursors **4** and **6**.

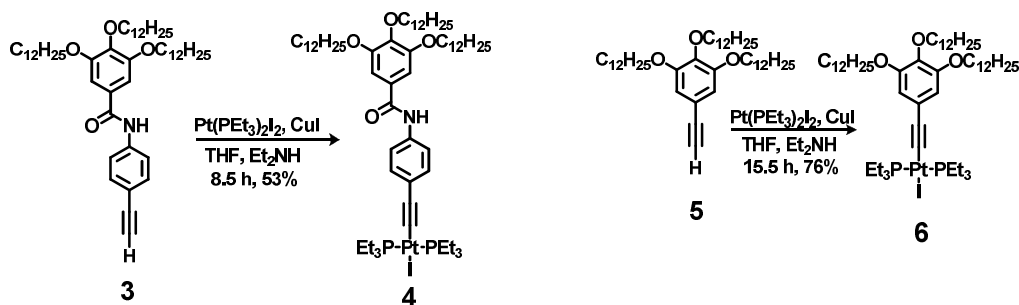

**Synthesis of compound 4.** A solution of *trans*-diiodobis (triethyl-phosphine) platinum (530 mg, 0.78 mmol) and cuprous iodide (26 mg, 13.7 mol %) in a THF/Et<sub>2</sub>NH mixture (60 mL/50 mL) was stirred at room temperature, and **3** (300 mg, 0.39 mmol) dissolved in THF (30 mL) was added dropwise for 1.5 h. The solvent was removed in vacuo. The residue was separated by column chromatography on silica gel (petroleum ether/ethyl acetate 10:1) to give the desired product **4** (300 mg, 53%) as a wheat-colored solid. R<sub>f</sub> = 0.4 (petroleum ether/ethyl acetate 10:1). M.p. 46 °C. IR (neat): ν/cm<sup>-1</sup> 3259, 3106, 3019, 2920, 2851, 2189, 2123, 2047, 1900, 1845, 1640, 1579, 1524, 1505, 1468, 1426, 1401, 1336, 1292, 1236, 1215, 1114, 1034, 1005, 951, 859, 836, 764, 729, 668, 642. <sup>1</sup>H NMR (400 MHz; CDCl<sub>3</sub>): δ 7.63 (s, 1H), 7.50 (d, 2H, J = 8.4 Hz), 7.28 (d, 2H, J = 8.4 Hz), 7.03 (s, 2H), 3.99-4.049 (m, 6H), 2.21-2.25 (m, 12H), 1.73-1.82 (m, 6H), 1.26 (m, 72H), 0.86 (m, 9H); <sup>31</sup>P NMR (161.9 MHz; CDCl<sub>3</sub>): δ 8.63 (J<sub>Pt-P</sub> = 2323.3 Hz); <sup>13</sup>C NMR (CDCl<sub>3</sub>; 100 MHz): δ 165.4, 153.2, 141.4, 135.4, 131.2, 129.9, 119.9, 105.7, 73.5, 69.4, 31.9, 30.3, 29.7, 29.6, 29.4,

29.3, 26.0, 22.7, 16.7, 16.6, 16.4, 14.1, 8.3.

**Synthesis of compound 6.** Following the procedure for the preparation of **4**. Compound **5** (260 mg, 0.4 mmol), *trans*-diiodobis (triethyl-phosphine) platinum (545 mg, 0.8 mmol), cuprous iodide (27 mg, 14 mol %), Et<sub>2</sub>NH (45 mL) and dried THF (80 mL) yielded **6** as a wheat-colored solid (366 mg, 76%) after purification by column chromatography (dichloromethane/petroleum ether 1:1). R<sub>f</sub> = 0.6 (dichloromethane/petroleum ether 1:1). M.p. 42 °C. IR (neat): ν/cm<sup>-1</sup> 3013, 2920, 2851, 2104, 1772, 1654, 1586, 1568, 1499, 1466, 1413, 1379, 1333, 1225, 1170, 1114, 1035, 1011, 980, 825, 769, 728, 665, 631. <sup>1</sup>H NMR (400 MHz; CDCl<sub>3</sub>): δ 6.47 (s, 2H), 3.89-3.95 (m, 6H), 2.21-2.23 (m, 12H), 1.75 (m, 6H), 1.26 (m, 72H), 0.86 (m, 9H); <sup>31</sup>P NMR (161.9 MHz; CDCl<sub>3</sub>): δ 8.66 (*J*<sub>Pt-P</sub> = 2326.5 Hz); <sup>13</sup>C NMR (CDCl<sub>3</sub>, 100 MHz): δ 152.7, 137.3, 123.2, 109.5, 73.4, 69.1, 31.9, 30.3, 29.7, 29.6, 29.4, 26.1, 22.7, 16.8, 16.6, 16.4, 14.1, 8.4, 8.3.

**Scheme S2.** Synthesis route of target molecules **1a-b**.

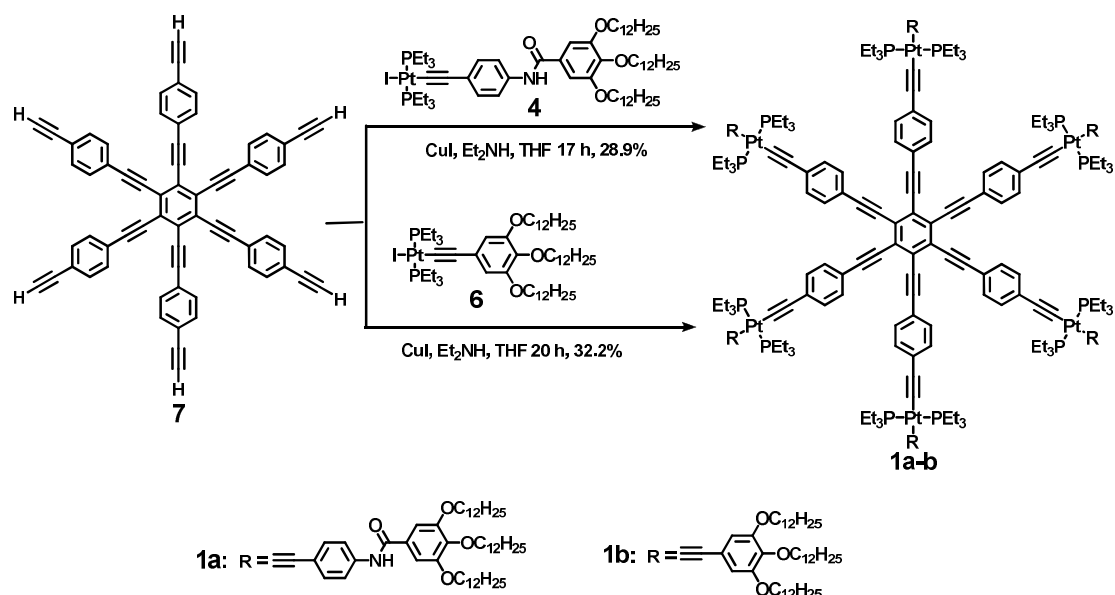

**Synthesis of compound 1a.** A 50 mL Schlenk flask was charged with **7** (25 mg, 0.03 mmol), **4** (485 mg, 0.36 mmol), and cuprous iodide (8.0 mg, 5 mol %), degassed, and back-filled three times with N<sub>2</sub>. Et<sub>2</sub>NH (3 mL) and dried THF (7 mL) were introduced into the reaction flask by syringe. The reaction mixture was stirred under an inert atmosphere at room temperature for about 17 h.

The solvent was removed by evaporation on a rotary evaporator. The residue was purified by column chromatography on silica gel (dichloromethane/acetone 50:1) to give **1a** (70 mg, 28.9%) as a orange red solid.  $R_f = 0.8$  (dichloromethane/acetone 50:1). IR (neat):  $\nu/\text{cm}^{-1}$  3734, 2961, 2922, 2851, 2200, 2099, 1583, 1504, 1466, 1335, 1276, 1261, 1105, 1034, 821, 803, 764, 751, 647, 635, 621, 609.  $^1\text{H}$  NMR (400 MHz;  $\text{CD}_2\text{Cl}_2$ ):  $\delta$  7.73 (s, 6H), 7.48-7.54 (m, 24H), 7.25-7.31 (m, 24H), 7.03 (s, 12H), 3.97-4.05 (m, 36H), 2.20 (m, 72H), 1.71-1.84 (m, 36H), 1.27 (s, 396H), 0.88 (m, 54H);  $^{31}\text{P}$  NMR (161.9 MHz;  $\text{CD}_2\text{Cl}_2$ ):  $\delta$  11.96 ( $J_{\text{Pt-P}} = 2358.9$  Hz);  $^{13}\text{C}$  NMR ( $\text{CD}_2\text{Cl}_2$ , 100 MHz):  $\delta$  165.5, 153.6, 141.6, 131.9, 131.7, 131.4, 130.4, 120.2, 114.8, 105.8, 73.9, 69.7, 32.4, 30.7, 30.1, 29.8, 26.5, 23.1, 17.0, 16.8, 16.6, 14.3, 8.6. MALDI-TOF MS of **1a**:  $m/z$  calcd for  $\text{C}_{444}\text{H}_{696}\text{N}_6\text{O}_{24}\text{P}_{12}\text{Pt}_6$  ( $[\text{M}+\text{H}]^+$ ) 8038.82, found 8038.76.

**Synthesis of compound 1b.** Following the procedure for the preparation of **1a**. **6** (440 mg, 0.36 mmol), **7** (30 mg, 0.036 mmol), cuprous iodide (10 mg, 5 mol %),  $\text{Et}_2\text{NH}$  (3 mL) and dried THF (7 mL) yielded **1b** as a orange red solid (85 mg, 32.2%) after purification by column chromatography (dichloromethane/acetone 50:1).  $R_f = 0.5$  (dichloromethane/acetone 50:1). M.p. 74 °C. IR (neat):  $\nu/\text{cm}^{-1}$  2959, 2922, 2852, 2200, 2098, 1742, 1591, 1568, 1499, 1466, 1414, 1378, 1332, 1262, 1228, 1170, 1113, 1035, 832, 768, 732, 631.  $^1\text{H}$  NMR (400 MHz;  $\text{CD}_2\text{Cl}_2$ ):  $\delta$  7.52 (d,  $J = 6.8$  Hz, 12H), 7.30 (d,  $J = 7.6$  Hz, 12H), 6.45 (s, 12H), 3.85-3.94 (m, 36H), 2.18 (m, 72H), 1.54 (m, 36H), 1.27 (s, 396H), 0.88 (m, 54H);  $^{31}\text{P}$  NMR (161.9 MHz;  $\text{CD}_2\text{Cl}_2$ ):  $\delta$  11.64 ( $J_{\text{Pt-P}} = 2357.3$  Hz);  $^{13}\text{C}$  NMR ( $\text{CD}_2\text{Cl}_2$ ; 100 MHz):  $\delta$  153.1, 137.0, 131.9, 131.3, 130.4, 127.3, 124.0, 119.4, 109.4, 100.4, 88.4, 73.8, 69.3, 32.4, 30.2, 30.1, 30.1, 29.9, 29.8, 29.8, 26.6, 23.1, 16.9, 16.8, 16.6, 14.3, 8.6. MALDI-TOF MS of **1b**:  $m/z$  calcd for  $\text{C}_{402}\text{H}_{666}\text{O}_{18}\text{P}_{12}\text{Pt}_6$  ( $[\text{M}+\text{H}]^+$ ) 7324.59, found 7323.24.

**Scheme S3.** Synthesis route of target molecules **2a-b**.

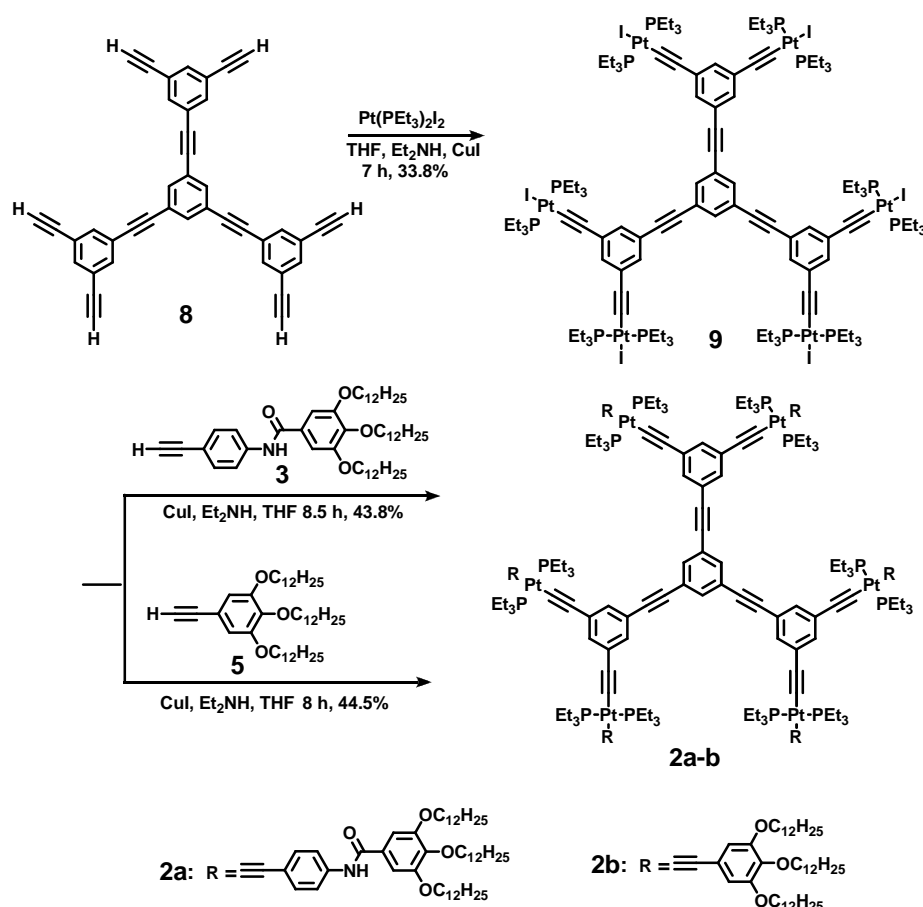

**Synthesis of compound 9.** Following the procedure for the preparation of **1a**, **8** (60 mg, 0.12 mmol), *trans*-diiodobis (triethyl-phosphine) platinum (945 mg, 1.4 mmol), cuprous iodide (10.5 mg, 5.5 mol%), Et<sub>2</sub>NH (10 mL) and dried THF (20 mL) yielded **9** as a yellow solid (150 mg, 33.8%) after purification by column chromatography (dichloromethane:). R<sub>f</sub> = 0.8 (dichloromethane). M.p. 168 °C. IR (neat): ν/cm<sup>-1</sup> 3738, 3670, 3658, 2988, 2968, 2927, 2903, 2882, 2731, 2356, 2114, 1772, 1748, 1568, 1453, 1408, 1378, 1254, 1199, 1155, 1049, 1034, 975, 868, 764, 742, 729, 682, 627. <sup>1</sup>H NMR (400 MHz; CDCl<sub>3</sub>): δ 7.63 (s, 3H), 7.21 (d, *J* = 1.2 Hz, 6H), 7.18 (s, 3H), 2.21-2.25 (m, 72H), 1.13-1.21 (m, 108H); <sup>31</sup>P NMR (161.9 MHz; CDCl<sub>3</sub>): δ 8.74 (*J*<sub>Pt-P</sub> = 2318.4 Hz); <sup>13</sup>C NMR (CDCl<sub>3</sub>; 100 MHz): δ 134.0, 133.3, 130.6, 128.7, 124.0, 122.4, 99.2, 91.2, 91.0, 90.9, 90.4, 87.3, 29.7, 16.7, 16.6, 16.4, 8.3.

**Synthesis of compound 2a.** Following the procedure for the preparation of **1a**, **9** (150 mg, 0.039 mmol), **3** (360.5 mg, 0.466 mmol), cuprous iodide (10 mg, 5 mol %), Et<sub>2</sub>NH (3.5 mL) and dried

THF (7 mL) yielded **2a** as a gray solid (131 mg, 43.8%) after purification by column chromatography (dichloromethane).  $R_f = 0.5$  (dichloromethane). M.p. 108 °C. IR (neat):  $\nu/\text{cm}^{-1}$  2963, 2921, 2851, 2099, 1644, 1581, 1505, 1465, 1402, 1335, 1261, 1092, 1081, 868, 798, 766, 684.  $^1\text{H}$  NMR (400 MHz;  $\text{CD}_2\text{Cl}_2$ ):  $\delta$  7.80 (s, 6H), 7.67 (s, 3H), 7.50 (d,  $J = 8$  Hz, 12H), 7.26 (d,  $J = 8$  Hz, 12H), 7.21 (s, 6H), 7.17 (s, 3H), 7.03 (s, 12H), 3.96-4.02 (m, 36H), 2.19 (m, 72H), 1.70-1.84 (m, 36H), 1.22-1.48 (m, 396H), 0.88 (m, 54H).  $^{31}\text{P}$  NMR (161.9 MHz,  $\text{CD}_2\text{Cl}_2$ ):  $\delta$  11.95 ( $J_{\text{Pt-P}} = 2362.1$  Hz);  $^{13}\text{C}$  NMR ( $\text{CD}_2\text{Cl}_2$ ; 100 MHz):  $\delta$  164.6, 152.7, 140.7, 130.7, 129.4, 124.3, 119.3, 104.9, 72.9, 68.8, 31.4, 29.8, 29.1, 28.9, 25.6, 22.1, 16.1, 15.9, 15.7, 13.3, 7.6. MALDI-TOF MS of **2a**:  $m/z$  calcd for  $\text{C}_{420}\text{H}_{684}\text{N}_6\text{O}_{24}\text{P}_{12}\text{Pt}_6$  ( $[\text{M}+\text{H}]^+$ ) 7738.72, found 7738.60.

**Synthesis of compound 2b.** Following the procedure for the preparation of **1a**, **9** (92 mg, 0.024 mmol), **5** (188 mg, 0.29 mmol), cuprous iodide (6 mg, 3 mol %),  $\text{Et}_2\text{NH}$  (2.5 mL) and dried THF (4.5 mL) yielded **2b** as a gray solid (75 mg, 44.5%) after purification by column chromatography (dichloromethane).  $R_f = 0.4$  (dichloromethane). M.p. 70 °C. IR (neat):  $\nu/\text{cm}^{-1}$  2922, 2852, 2096, 1567, 1497, 1467, 1413, 1379, 1332, 1227, 1115, 1035, 868, 828, 767, 733, 683, 631.  $^1\text{H}$  NMR (400 MHz;  $\text{CD}_2\text{Cl}_2$ ):  $\delta$  7.65 (s, 3H), 7.19 (s, 6H), 7.16 (s, 3H), 6.44 (s, 12H), 3.85-3.95 (m, 36H), 2.15-2.19 (m, 72H), 1.77 (m, 36H), 1.21-1.27 (s, 396H), 0.88 (m, 54H).  $^{31}\text{P}$  NMR (161.9 MHz,  $\text{CD}_2\text{Cl}_2$ ):  $\delta$  11.94 ( $J_{\text{Pt-P}} = 2362.1$  Hz);  $^{13}\text{C}$  NMR ( $\text{CD}_2\text{Cl}_2$ ; 100 MHz):  $\delta$  153.2, 137.2, 134.3, 134.2, 130.8, 129.5, 124.6, 124.2, 122.6, 110.0, 109.6, 108.6, 91.1, 87.4, 73.8, 69.4, 32.4, 30.8, 30.2, 30.1, 29.9, 29.8, 26.6, 23.1, 17.0, 16.9, 16.7, 14.3, 8.6. MALDI-TOF MS of **2b**:  $m/z$  calcd for  $\text{C}_{378}\text{H}_{654}\text{O}_{18}\text{P}_{12}\text{Pt}_6$  ( $[\text{M}+\text{H}]^+$ ) 7024.5, found 7024.1.



### 3. Characterization of Complexes 1a–b and 2a–b.

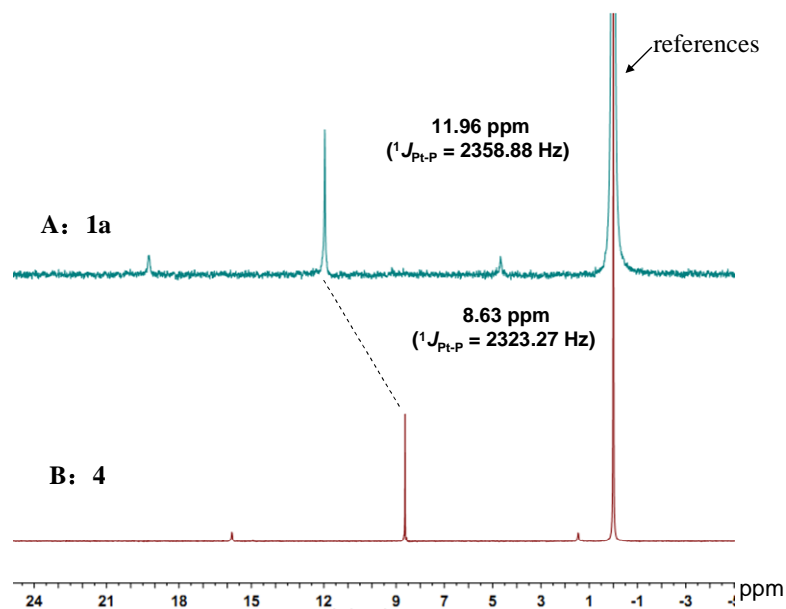

Fig. S1  $^{31}\text{P}$  NMR spectra ( $\text{CD}_2\text{Cl}_2$ , 298 K) of (A) star-shaped complex **1a**, (B) platinum-acetylide precursor **4**.

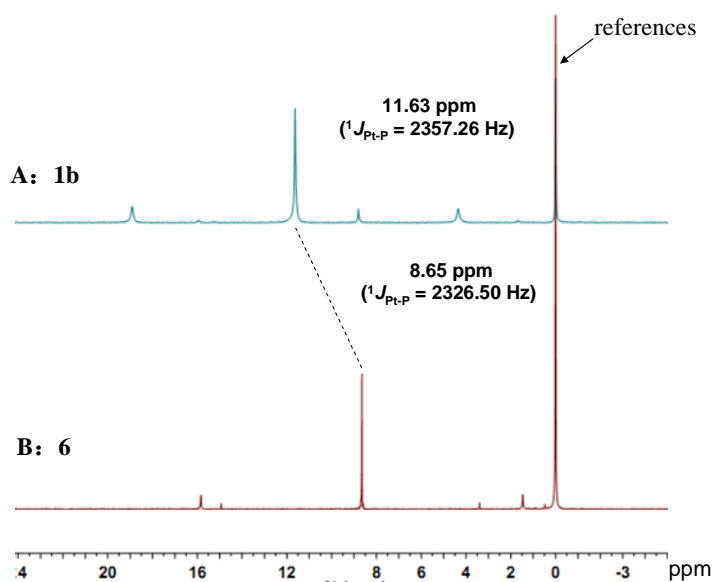

Fig. S2  $^{31}\text{P}$  NMR spectra ( $\text{CD}_2\text{Cl}_2$ , 298 K) of (A) star-shaped complex **1b**, (B) platinum-acetylide precursor **6**.

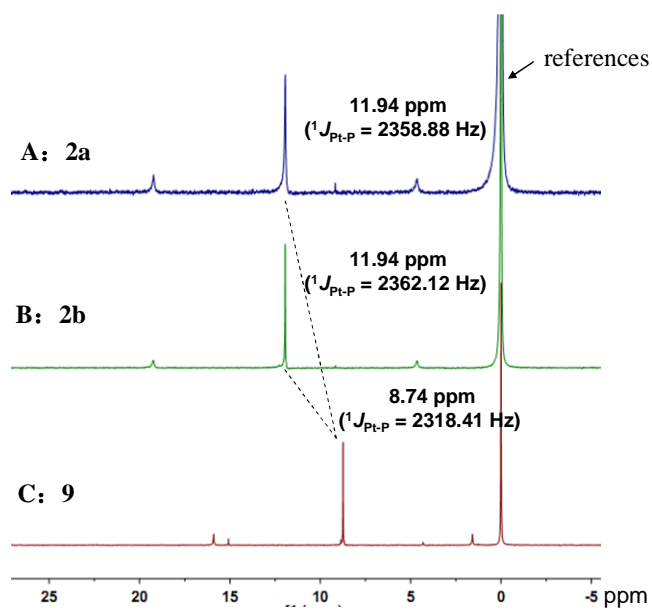

Fig. S3  $^{31}\text{P}$  NMR spectra ( $\text{CD}_2\text{Cl}_2$ , 298 K) of (A) branched complex **2a**, (B) branched complex **2b**, (C) branched hexakisplatinum precursor **9**.

#### 4. UV-vis and Fluorescence Spectra of 1a-b and 2a-b.

**Table S1.** Photophysical data for compounds **1a**, **1b**, **2a** and **2b**.

| Compound (concentration/M <sup>-1</sup> ) | solvent(298K)      | $\lambda_{\text{abs}}$ (nm) | $\epsilon$ (M <sup>-1</sup> cm <sup>-1</sup> ) | $\lambda_{\text{F}}$ (nm) |
|-------------------------------------------|--------------------|-----------------------------|------------------------------------------------|---------------------------|
| <b>1a</b> ( $4.0 \times 10^{-6}$ )        | Methylene chloride | 260.9                       | 133250                                         | 491.94                    |
|                                           |                    | 301.9                       | 184500                                         |                           |
|                                           |                    | 341.0                       | 243250                                         |                           |
|                                           |                    | 410.0                       | 264500                                         |                           |
| <b>1b</b> ( $4.0 \times 10^{-6}$ )        | Methylene chloride | 267.1                       | 150250                                         | 492.98                    |
|                                           |                    | 334.9                       | 180500                                         |                           |
|                                           |                    | 409.0                       | 224750                                         |                           |
| <b>2a</b> ( $3.0 \times 10^{-6}$ )        | Methylene chloride | 297.1                       | 177229                                         | 398.93                    |
|                                           |                    | 350.0                       | 208228                                         |                           |
| <b>2b</b> ( $3.0 \times 10^{-6}$ )        | Methylene chloride | 270.1                       | 200596                                         | 396.96                    |
|                                           |                    | 292.9                       | 232906                                         | 479.85                    |
|                                           |                    | 339.0                       | 236263                                         |                           |

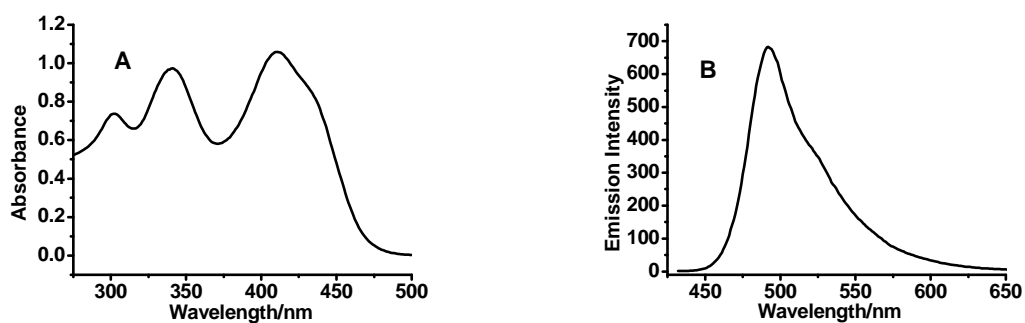

Fig. S4 (A) UV-vis absorption spectrum and (B) emission spectrum of complex **1a** in CH<sub>2</sub>Cl<sub>2</sub> (concentration =  $4.0 \times 10^{-6}$  M).

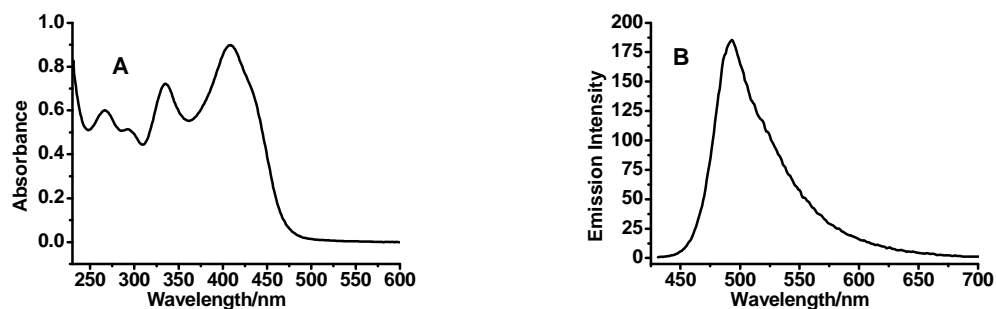

Fig. S5 (A) UV-vis absorption spectrum and (B) emission spectrum of complex **1b** in CH<sub>2</sub>Cl<sub>2</sub> (concentration =  $4.0 \times 10^{-6}$  M).

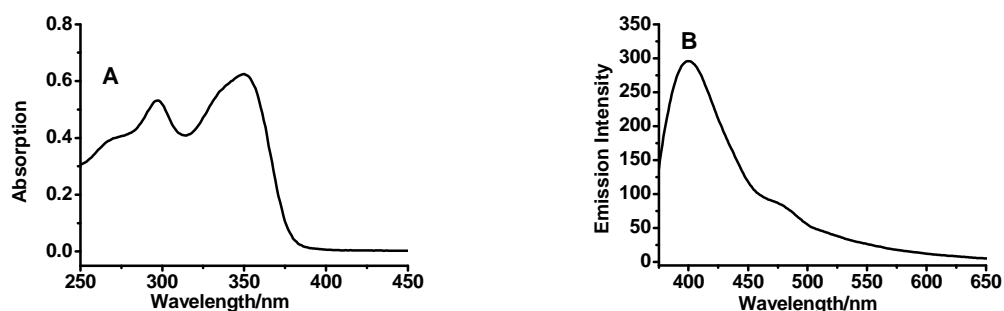

Fig. S6 (A) UV-vis absorption spectrum and (B) emission spectrum of complex **2a** in CH<sub>2</sub>Cl<sub>2</sub> (concentration =  $3.0 \times 10^{-6}$  M).

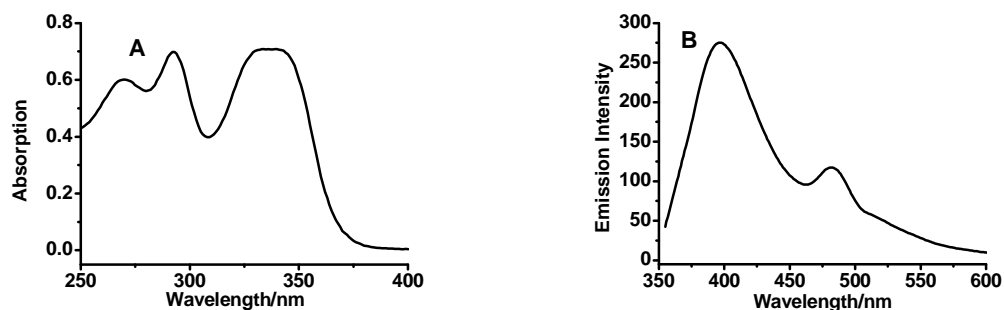

Fig. S7 (A) UV-vis absorption spectrum and (B) emission spectrum of complex **2b** in CH<sub>2</sub>Cl<sub>2</sub> (concentration =  $3.0 \times 10^{-6}$  M).

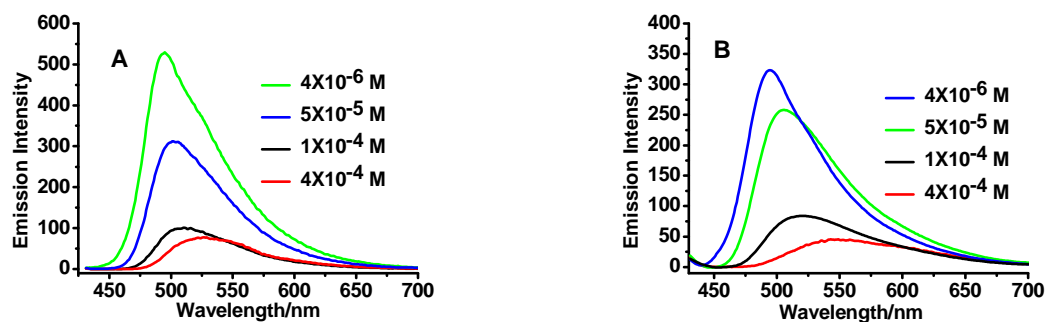

Fig. S8 Concentration dependent emission spectra of **1a** (A) and **1b** (B) in CH<sub>2</sub>Cl<sub>2</sub>/Acetone = 1:1.

## 5. Additional SEM Images of Complexes 1a and 2a at Different Scales.

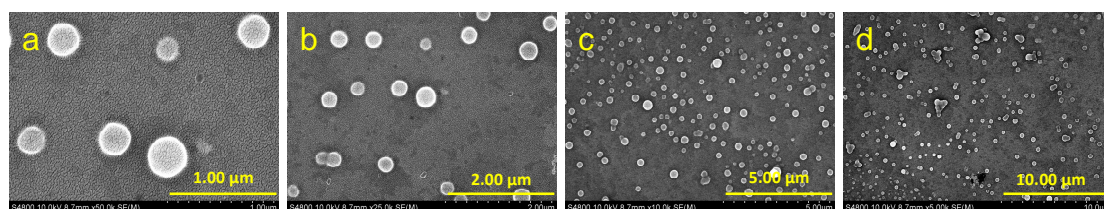

Fig. S9 SEM images of star-shaped complex **1a** prepared in  $\text{CH}_2\text{Cl}_2/\text{Acetone} = 3:1$  at different scales.

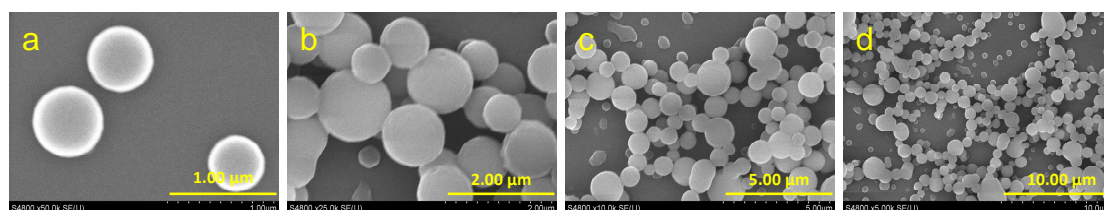

Fig. S10 SEM images of star-shaped complex **1a** prepared in  $\text{CH}_2\text{Cl}_2/\text{Acetone} = 1:1$  at different scales.

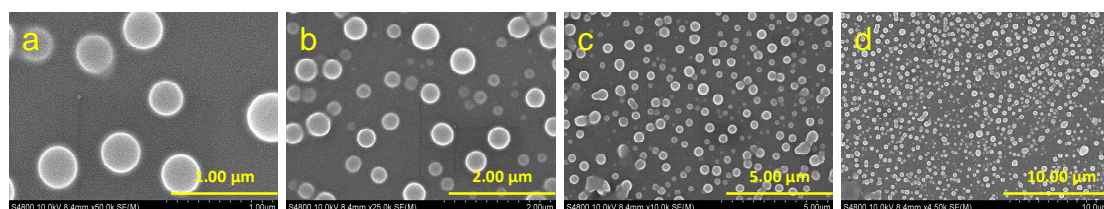

Fig. S11 SEM images of branched complex **2a** prepared in  $\text{CH}_2\text{Cl}_2/\text{Acetone} = 3:1$  at different scales.

## 6. Concentration-Dependent and Temperature-Dependent $^1\text{H}$ NMR Spectra of Complexes 1a and 2a.

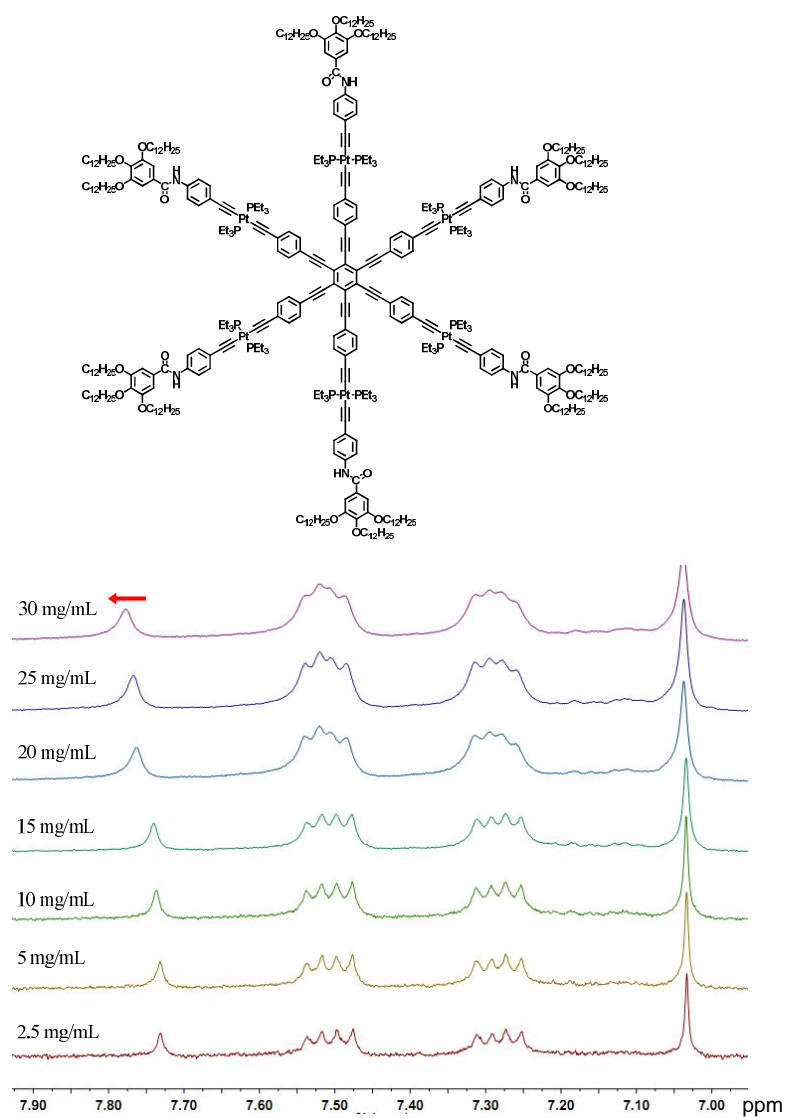

Fig. S12 Partial  $^1\text{H}$  NMR spectra (400 MHz,  $\text{CD}_2\text{Cl}_2$ ) of star-shaped complex **1a** at different concentrations at 25 °C showing the aromatic region (using TMS as internal standard).

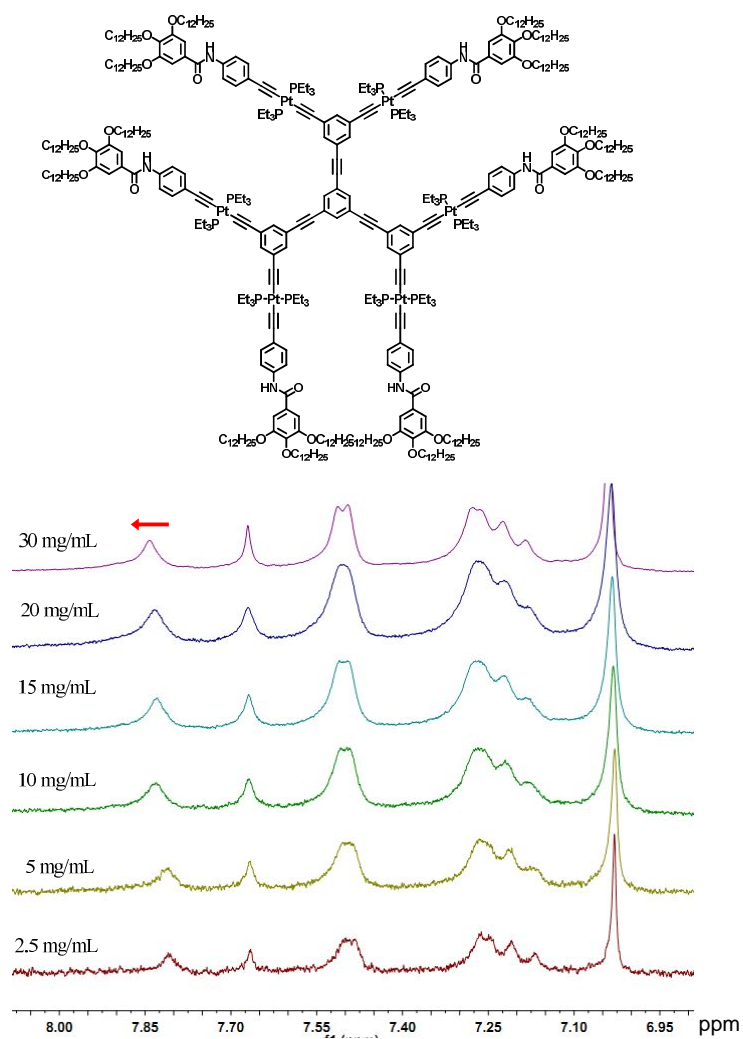

Fig. S13 Partial <sup>1</sup>H NMR spectra (400 MHz, CD<sub>2</sub>Cl<sub>2</sub>) of branched complex **2a** at different concentrations at 25 °C showing the aromatic region (using TMS as internal standard).

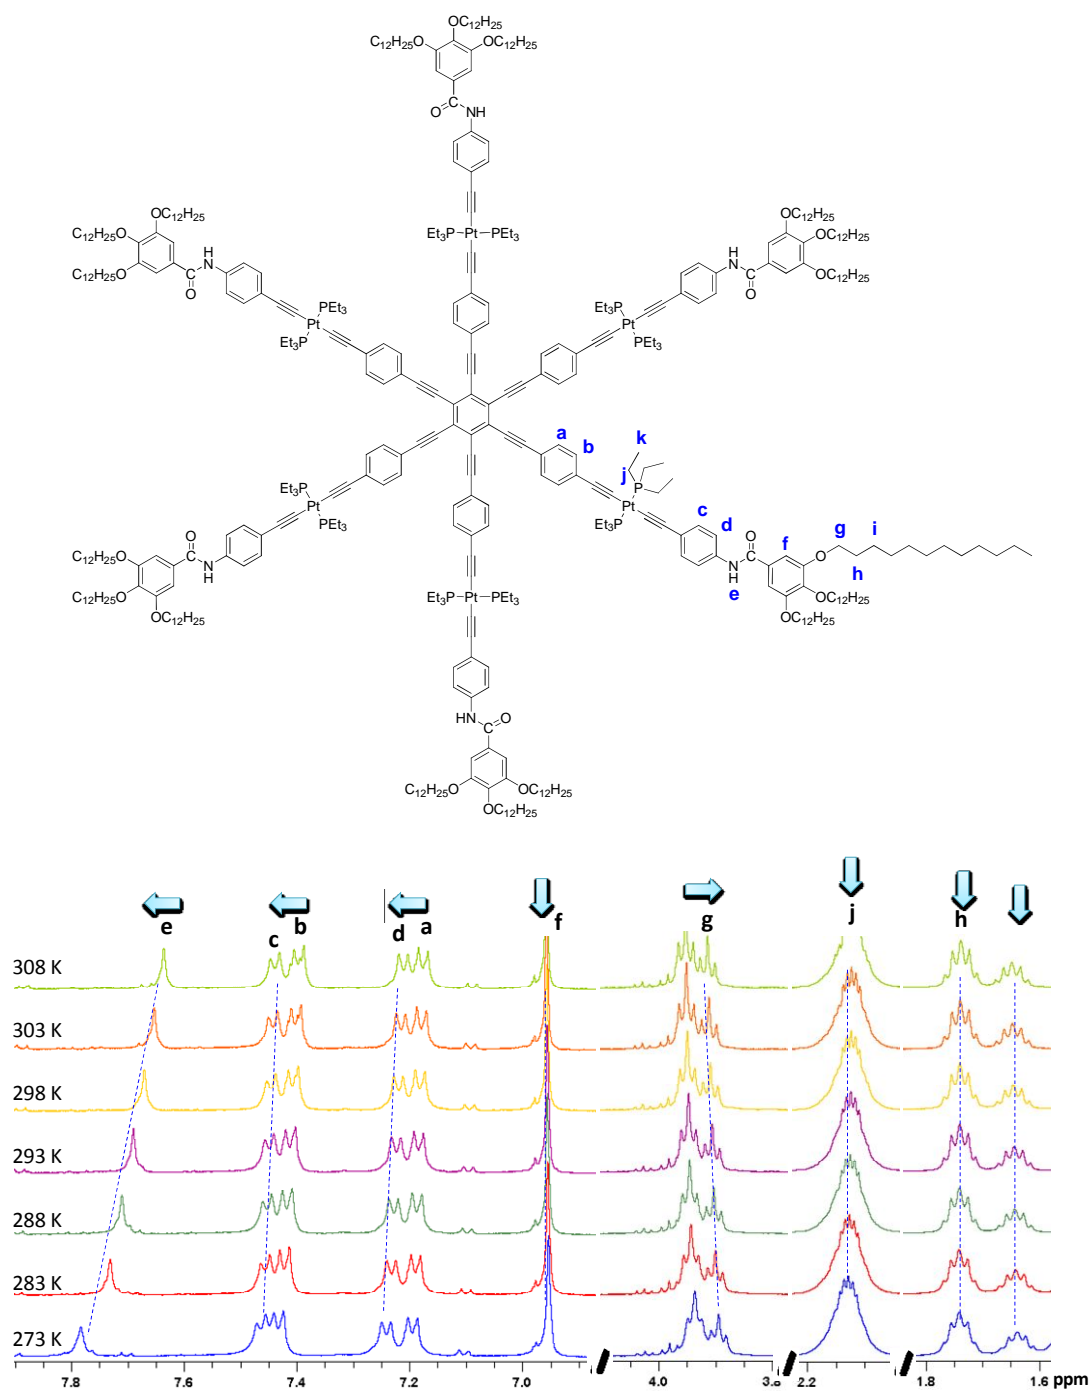

Fig. S14 Partial <sup>1</sup>H NMR spectra (500 MHz, CD<sub>2</sub>Cl<sub>2</sub>, 25 mg/ mL) of **1a** at variable temperature (using TMS as internal standard).



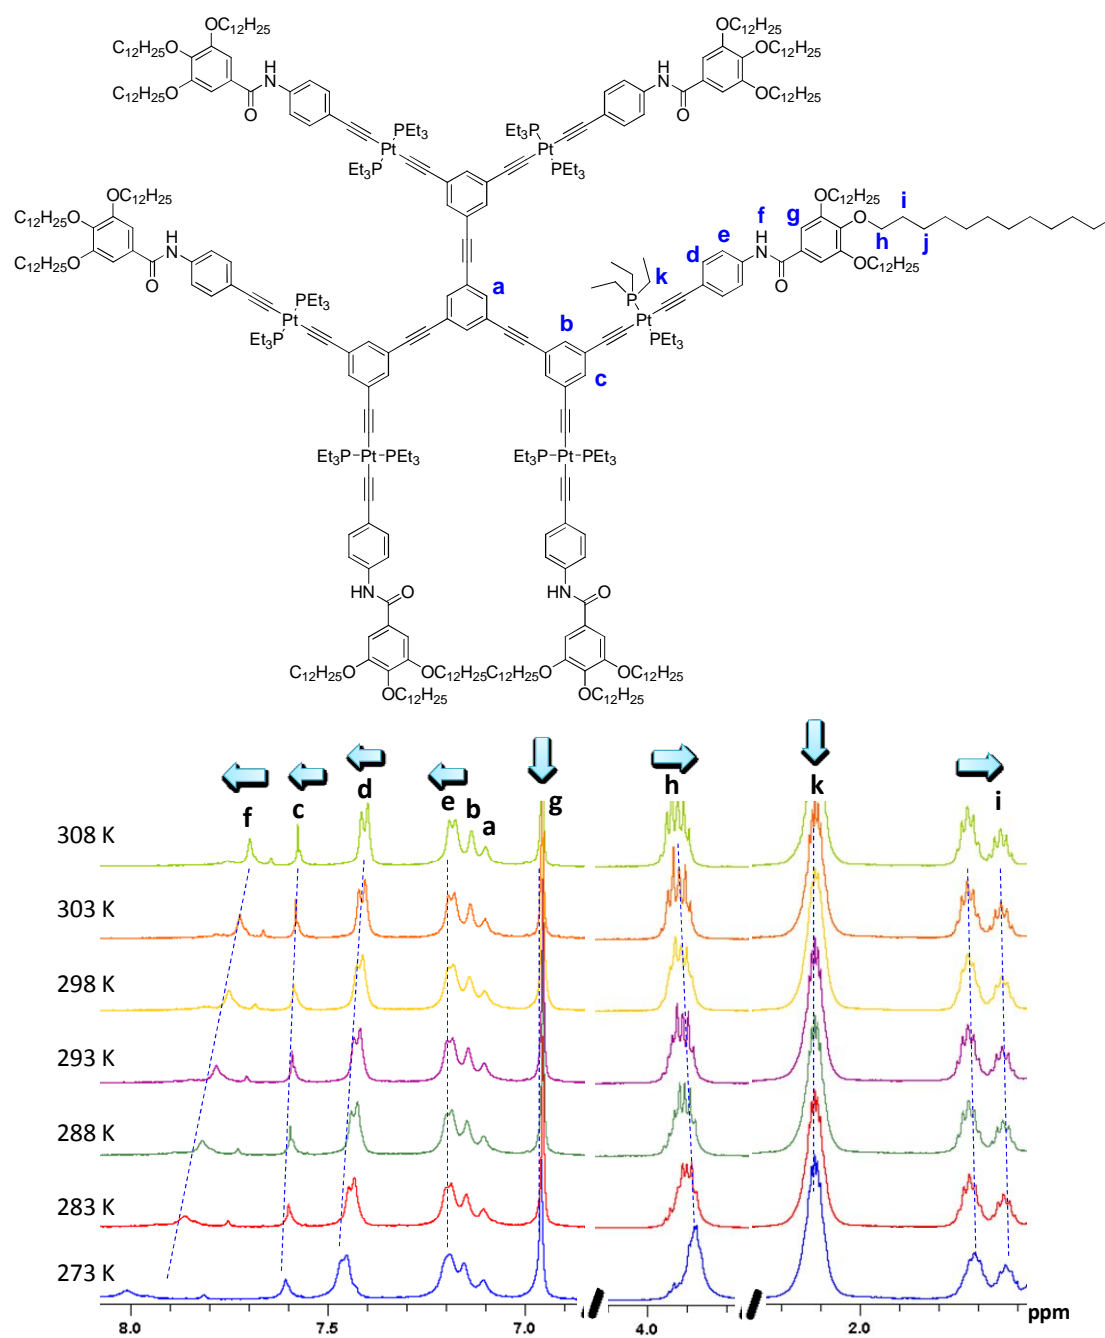

Fig. S15 Partial <sup>1</sup>H NMR spectra (500 MHz, CD<sub>2</sub>Cl<sub>2</sub>, 25 mg/ mL) of **2a** at variable temperature (using TMS as internal standard).

## 7. Gelation Tests.

A weighed sample of gelator was mixed with a solvent (0.05 mL) in a septum-capped vial and heated. If the compound was unable to dissolve, it was noted as insoluble (I). If a clear solution was obtained, the hot resulting solution was left for 24 h at room temperature. The aggregation state was then assessed. If no flow was observed when inverting the vial, a stable gel was formed and noted as gelation (G). If precipitation occurred, P was noted. If the clear solution (>100 mg/mL) was retained, it was marked as soluble (S). Repeated heating and cooling confirmed the thermo-reversibility of the gelation process. The critical gelator concentration (CGCs) of the organogelator was determined by measuring the minimum amount of gelator required for the formation of a stable gel at 25 °C. The SEM Samples were prepared by spinning the gels on a silicon substrate, dried under air.

**Table S2.** Gelation properties and critical gelator concentrations (CGCs) of complexes in various organic solvents at 25 °C.<sup>a</sup>

| solvent         | <b>2a</b> | <b>2b</b> | <b>1a</b> | <b>1b</b> |
|-----------------|-----------|-----------|-----------|-----------|
| cyclohexane     | G(11.5)   | S         | P         | S         |
| n-hexane        | G(19.5)   | S         | P         | S         |
| n-heptane       | G(19.5)   | S         | P         | S         |
| acetone         | P         | I         | I         | P         |
| tetrahydrofuran | S         | S         | S         | S         |
| ethyl acetate   | S         | S         | S         | S         |
| n-propanol      | I         | I         | I         | I         |
| toluene         | S         | S         | S         | S         |
| n-dodecane      | I         | S         | P         | S         |
| n-octane        | G(15.6)   | S         | PG        | S         |
| n-decane        | G(19.5)   | S         | PG        | S         |
| dioxane         | S         | S         | S         | S         |

<sup>a</sup>The value given in parentheses is the CGC in mg/mL.

Table S3. The gel-sol phase-transition temperature ( $T_{\text{gel}}$ ) of branched complex **2a**.

| solvent   | cyclohexane | <i>n</i> -hexane | <i>n</i> -heptane | <i>n</i> -octane | <i>n</i> -decane |
|-----------|-------------|------------------|-------------------|------------------|------------------|
| <b>2a</b> | 46-48°C     | 52-54°C          | 45-47°C           | 51-53°C          | 43-45°C          |

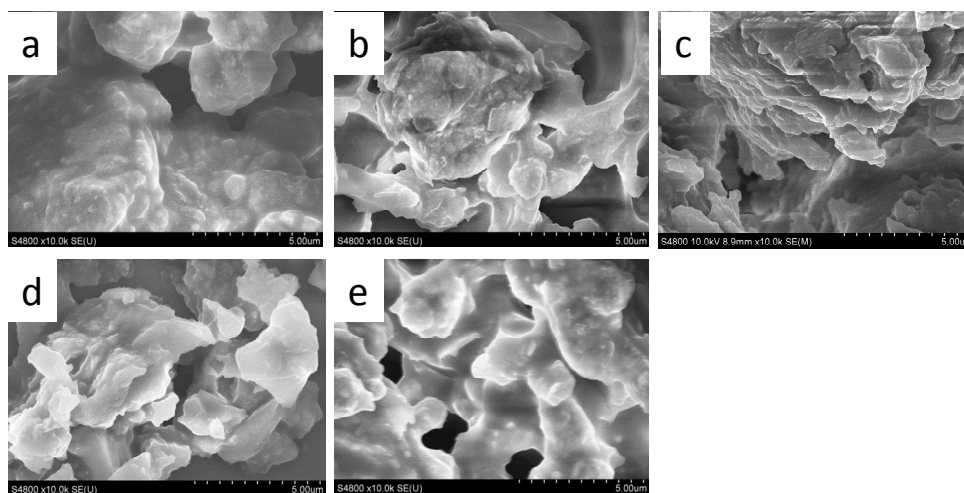

Fig. S16 SEM images of the xerogels of branched complex **2a** prepared in different solvents: (a) cyclohexane; (b) *n*-hexane; (c) *n*-heptane; (d) *n*-octane; (e) *n*-decane. Scale bar is 5.0µm. Samples were prepared by spinning the gels on a silicon substrate, dried under air.

## 8. Multiple Nuclear NMR ( $^1\text{H}$ , $^{31}\text{P}$ , and $^{13}\text{C}$ NMR) Spectra and MALDI-TOF MS of New Compounds.

Fig. S17 (A)  $^1\text{H}$  NMR, (B)  $^{31}\text{P}$  NMR and (C)  $^{13}\text{C}$  NMR spectra of platinum-acetylide precursor **4** in  $\text{CDCl}_3$ .

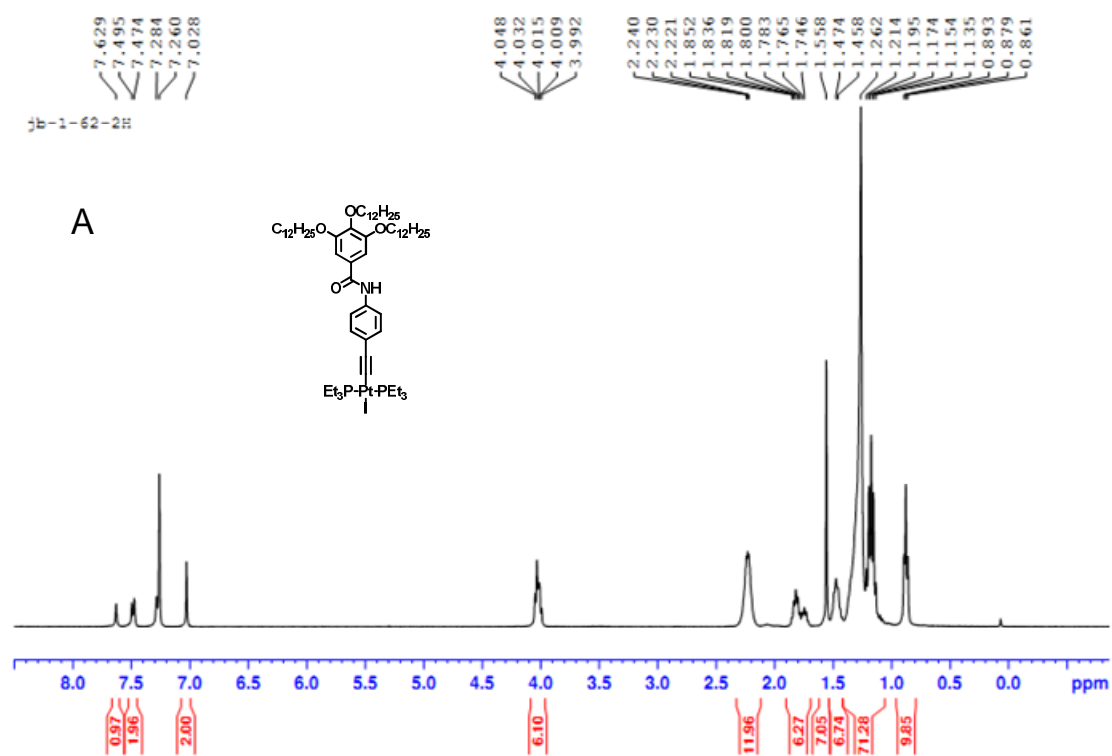

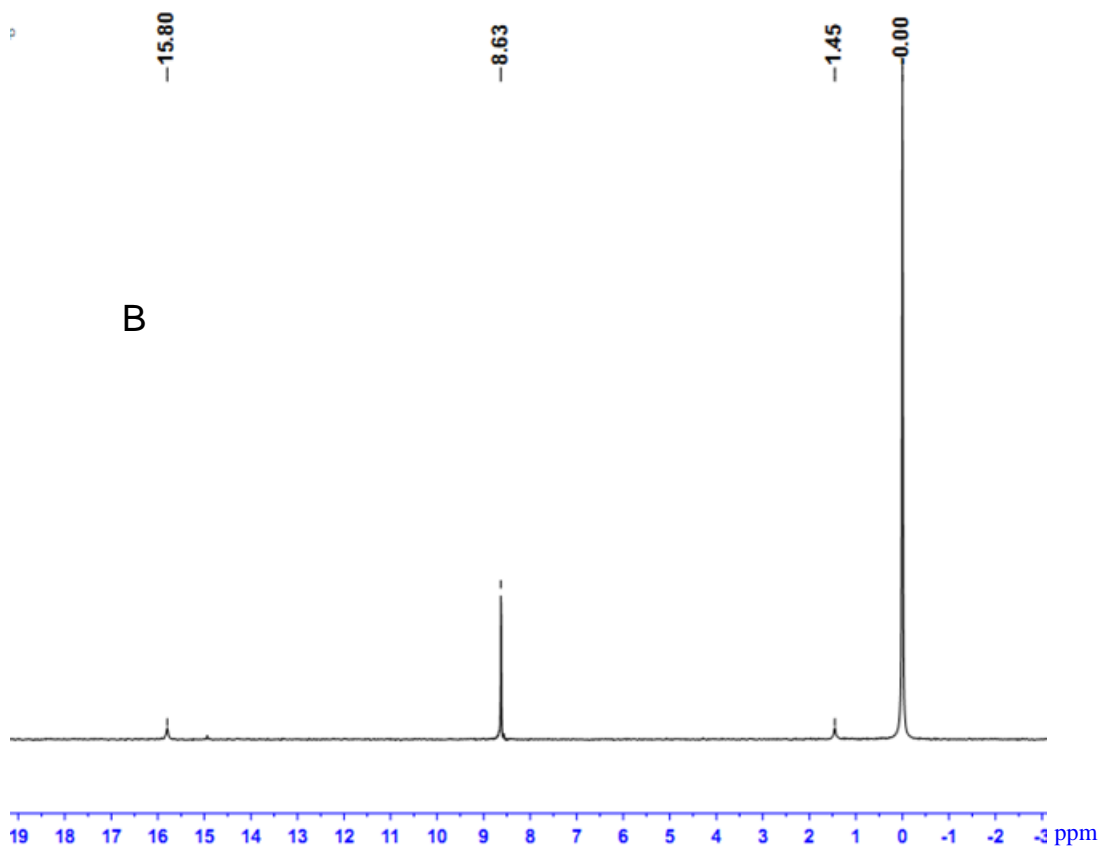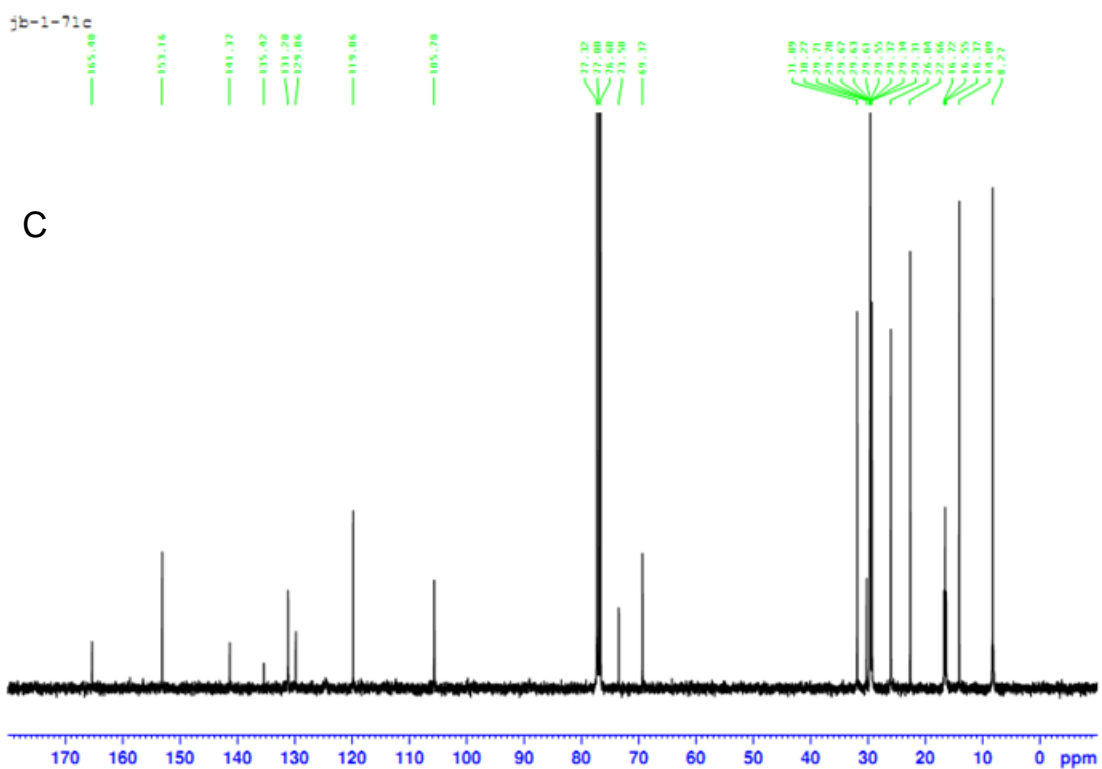

Fig. S18 (A)  $^1\text{H}$  NMR, (B)  $^{31}\text{P}$  NMR and (C)  $^{13}\text{C}$  NMR spectra of platinum-acetylide precursor **6** in  $\text{CDCl}_3$ .

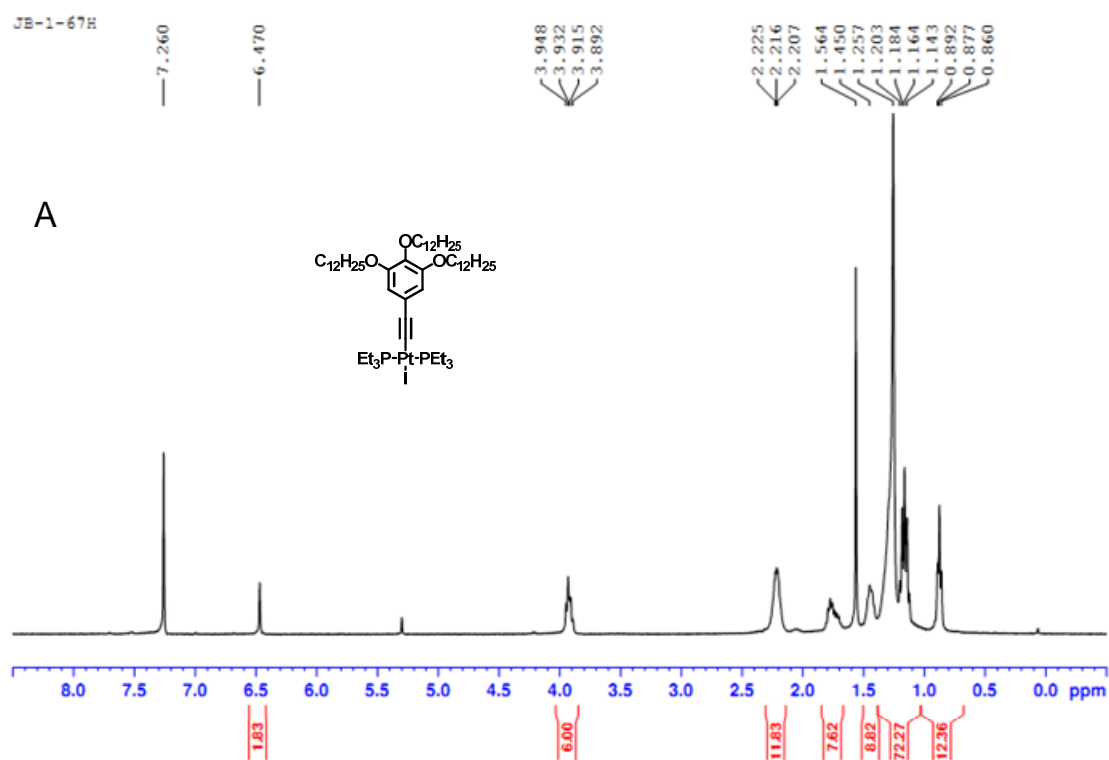

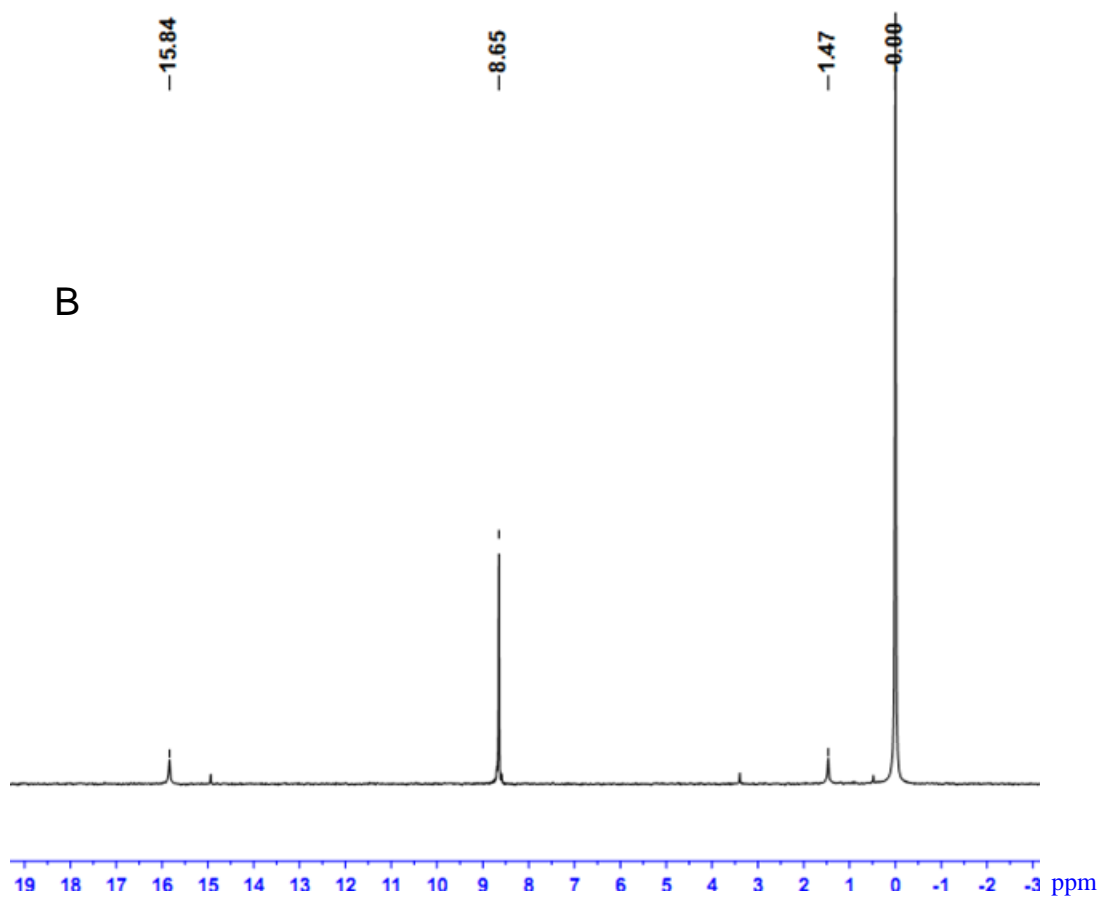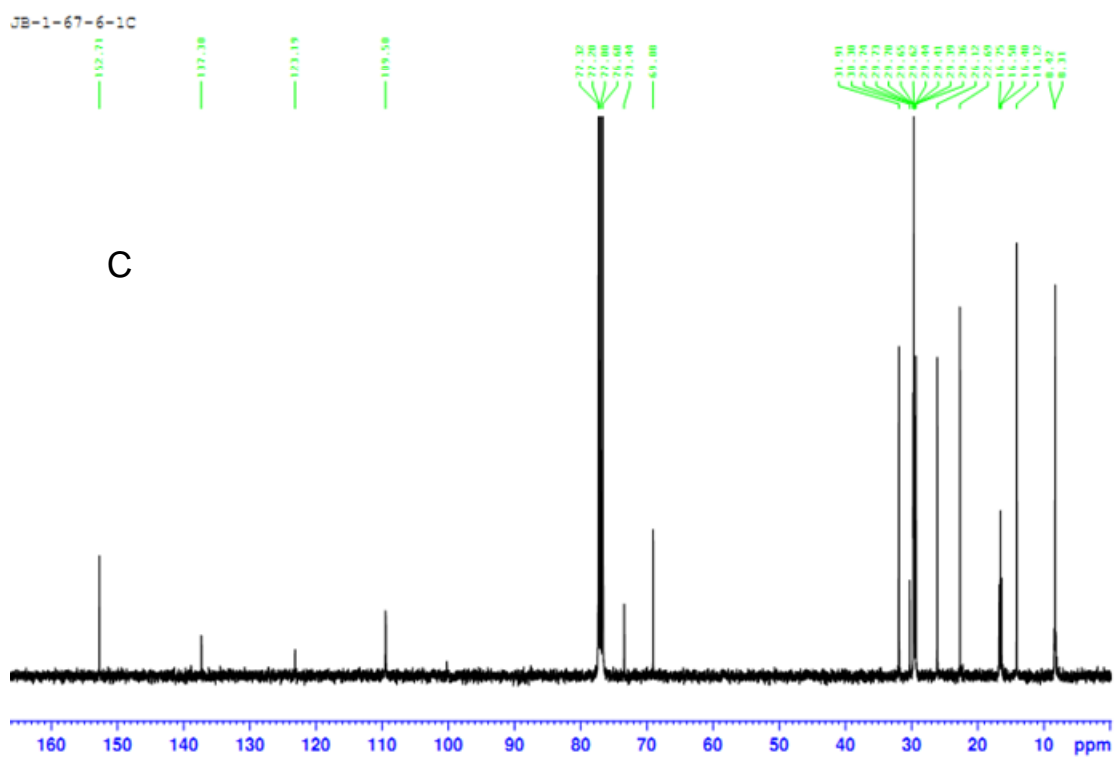

Fig. S19 (A)  $^1\text{H}$  NMR, (B)  $^{31}\text{P}$  NMR and (C)  $^{13}\text{C}$  NMR spectra of branched hexakisplatinum precursor **9** in  $\text{CDCl}_3$ .

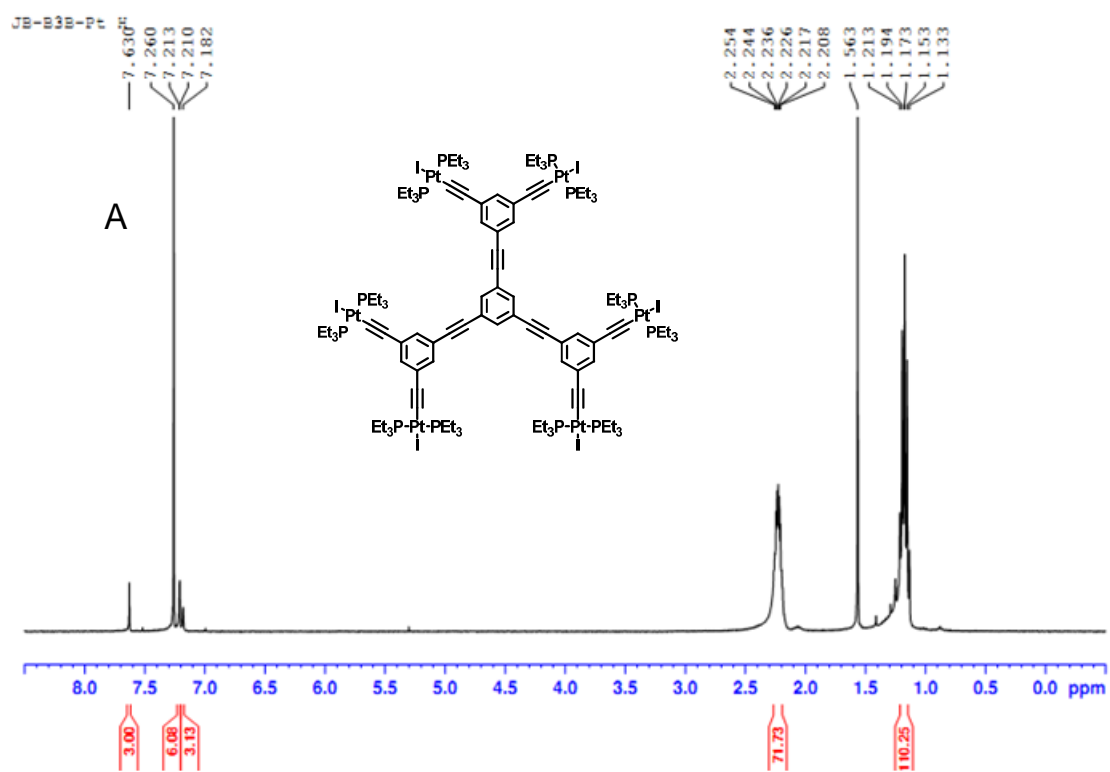



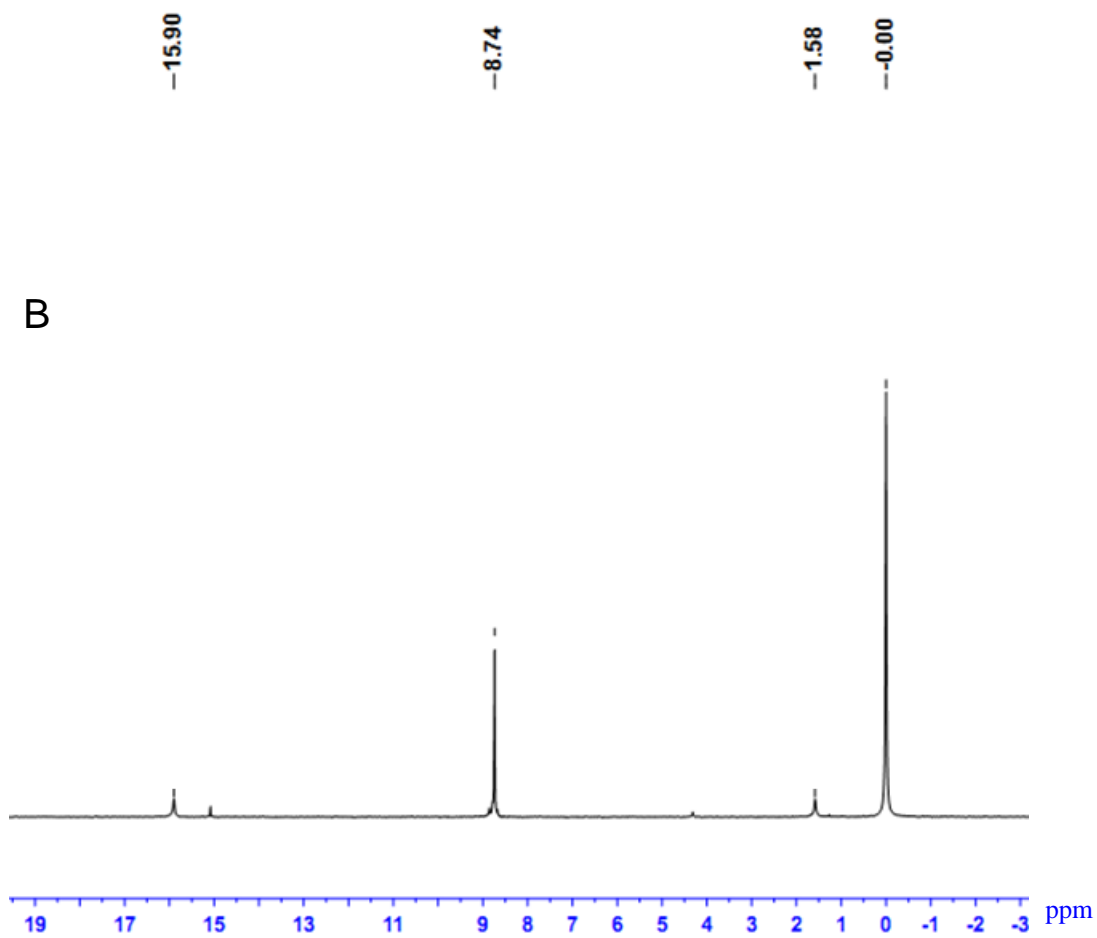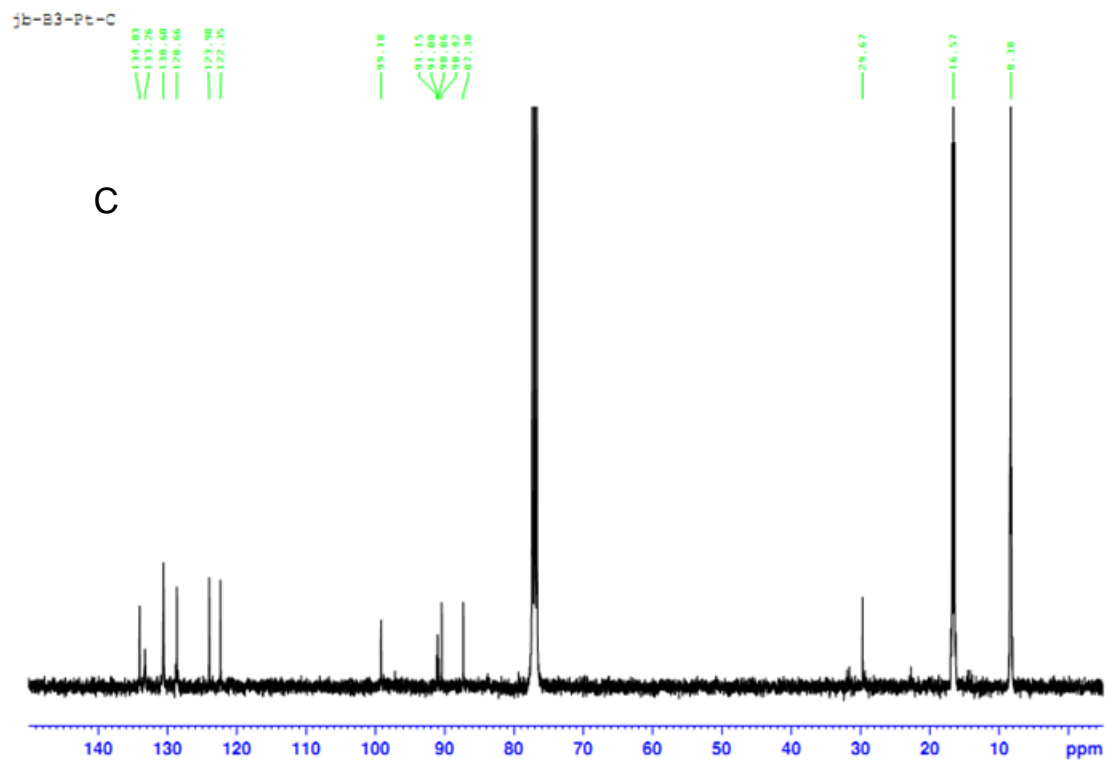

Fig. S20 (A)  $^1\text{H}$  NMR, (B)  $^{31}\text{P}$  NMR, (C)  $^{13}\text{C}$  NMR spectra and (D) MALDI-TOF MS of star-shaped complex **1a** in  $\text{CD}_2\text{Cl}_2$ .

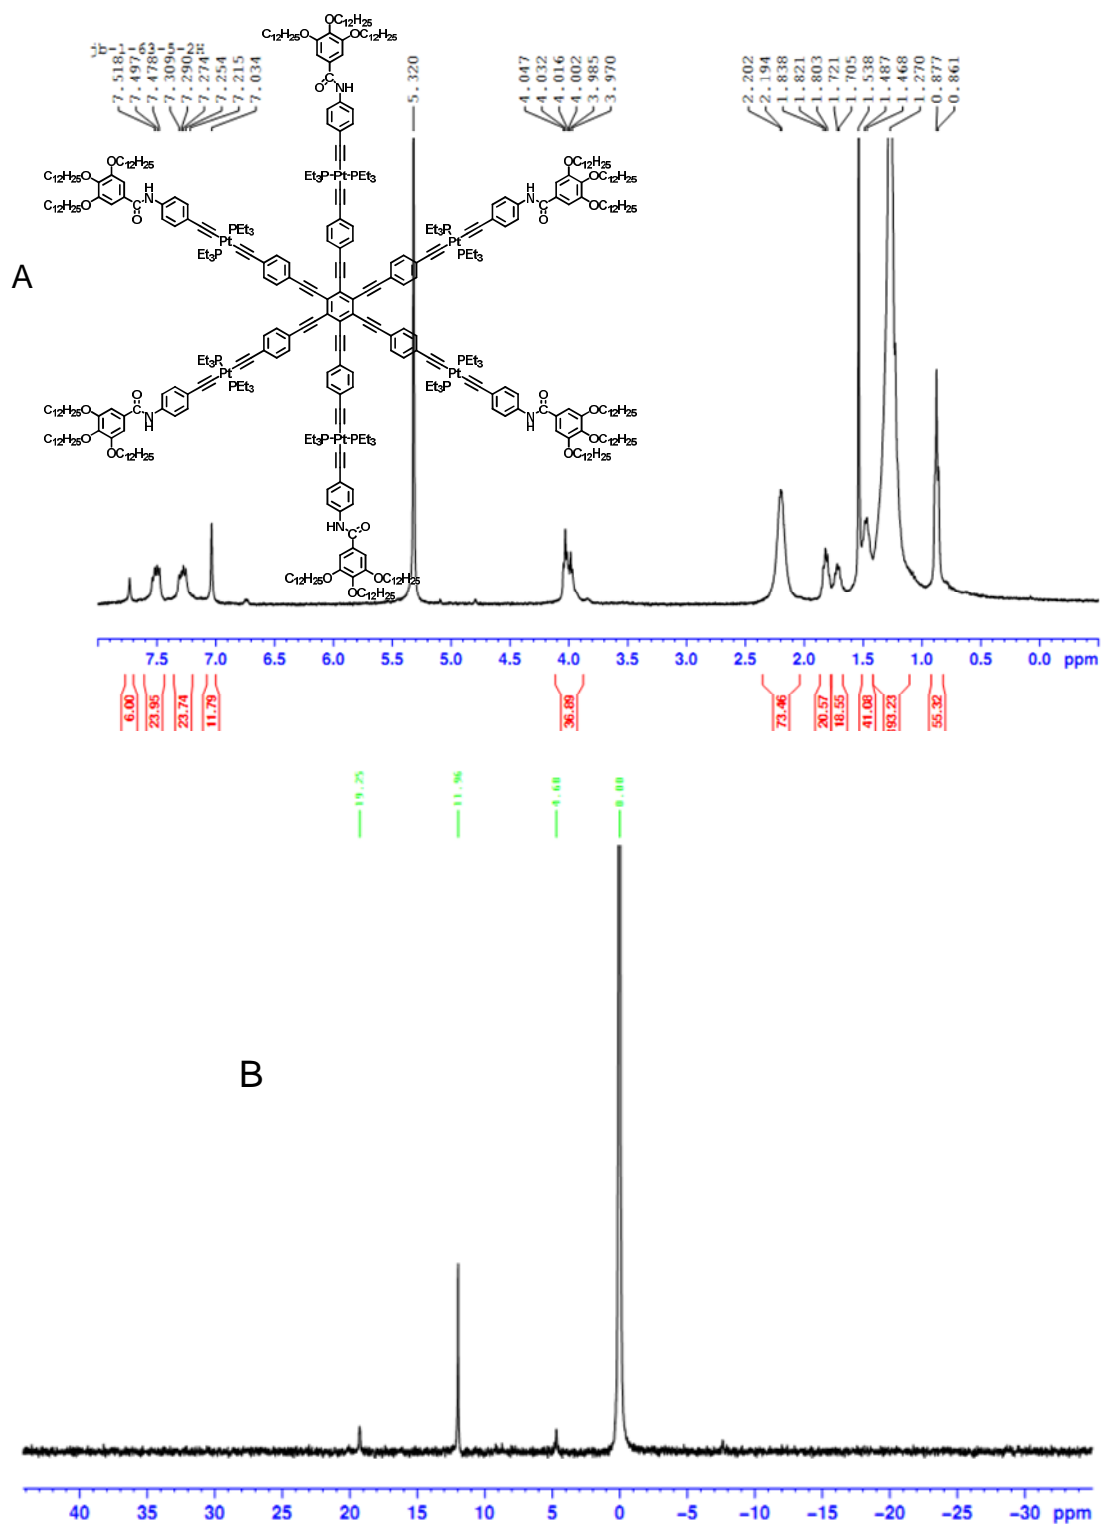

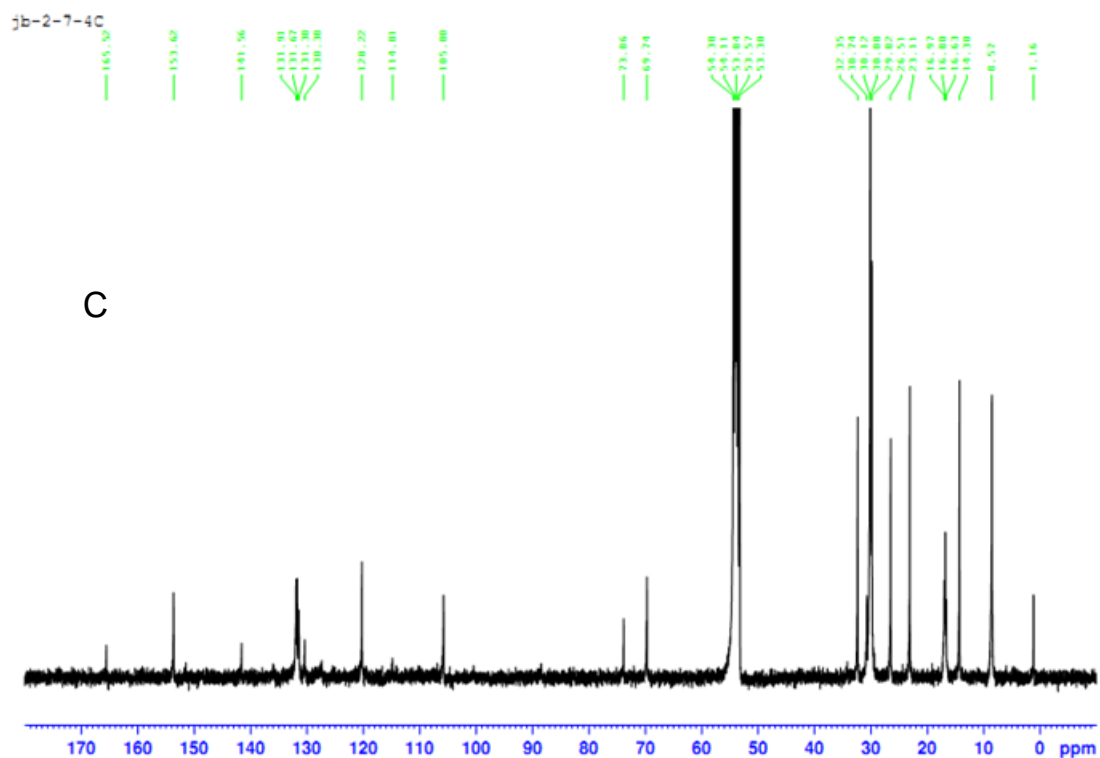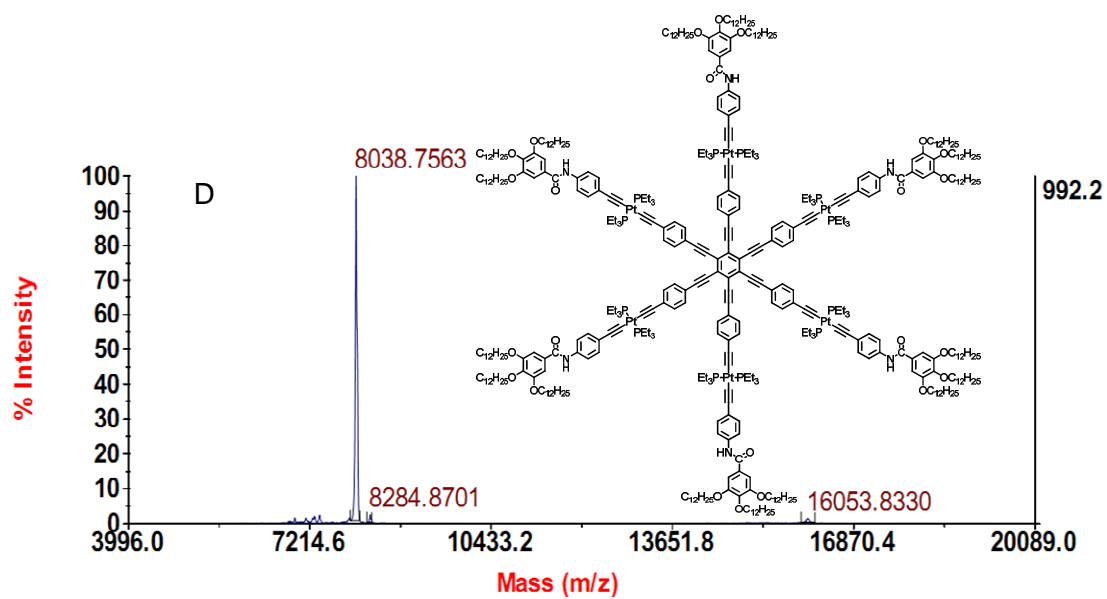



JB-2-5 C

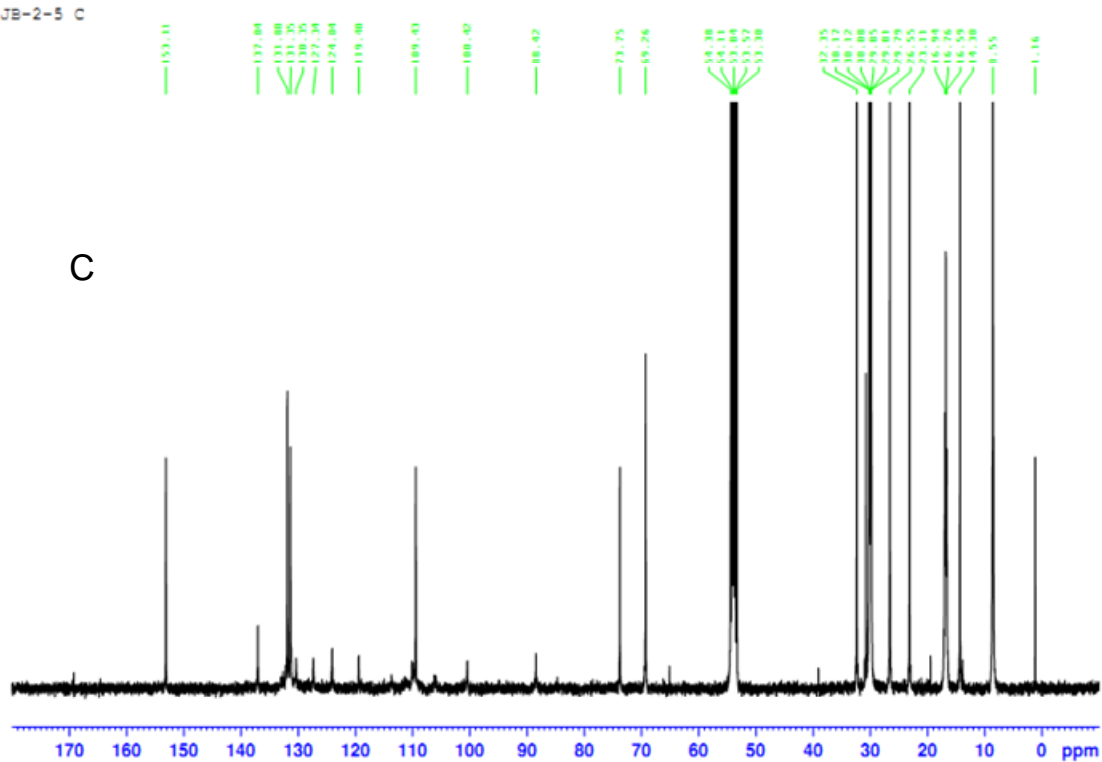

C

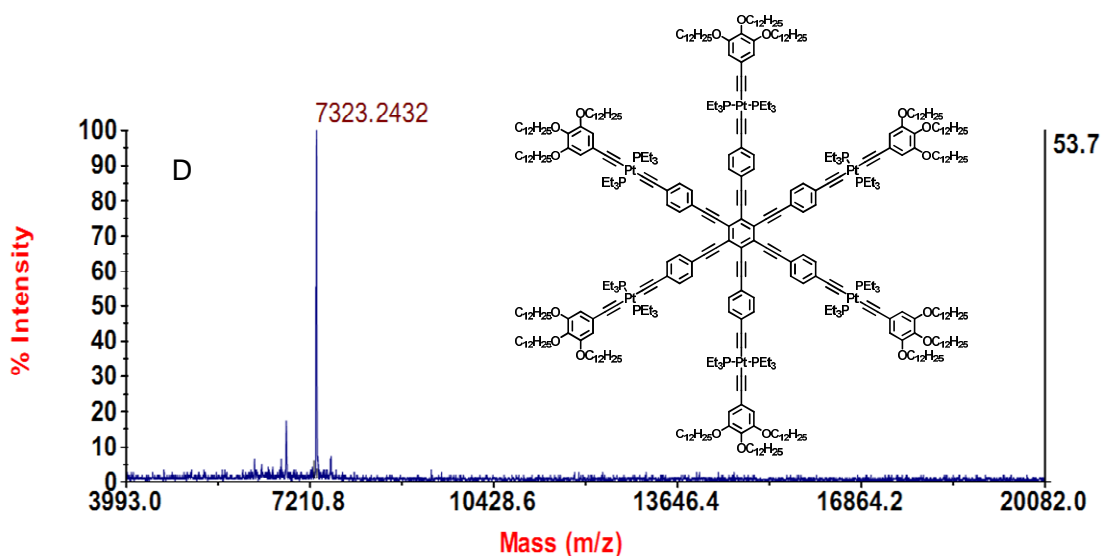

D

Fig. S22 (A)  $^1\text{H}$  NMR, (B)  $^{31}\text{P}$  NMR, (C)  $^{13}\text{C}$  NMR spectra and (D) MALDI-TOF MS of branched complex **2a** in  $\text{CD}_2\text{Cl}_2$ .

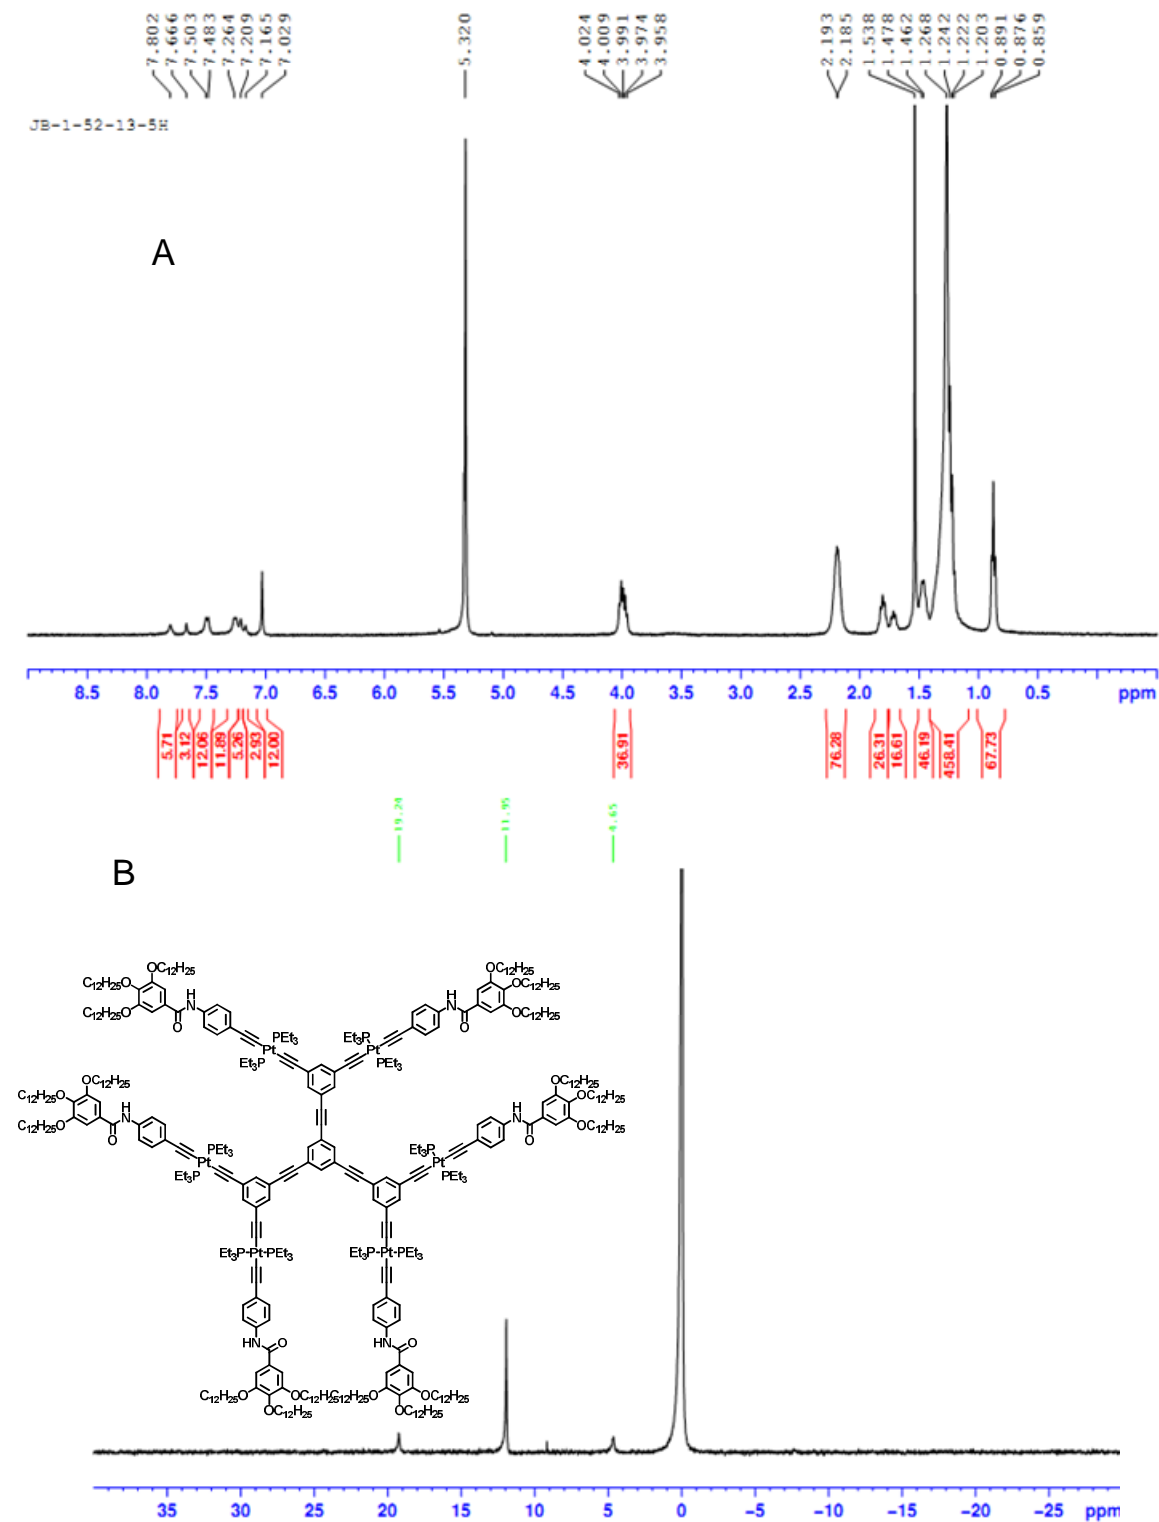

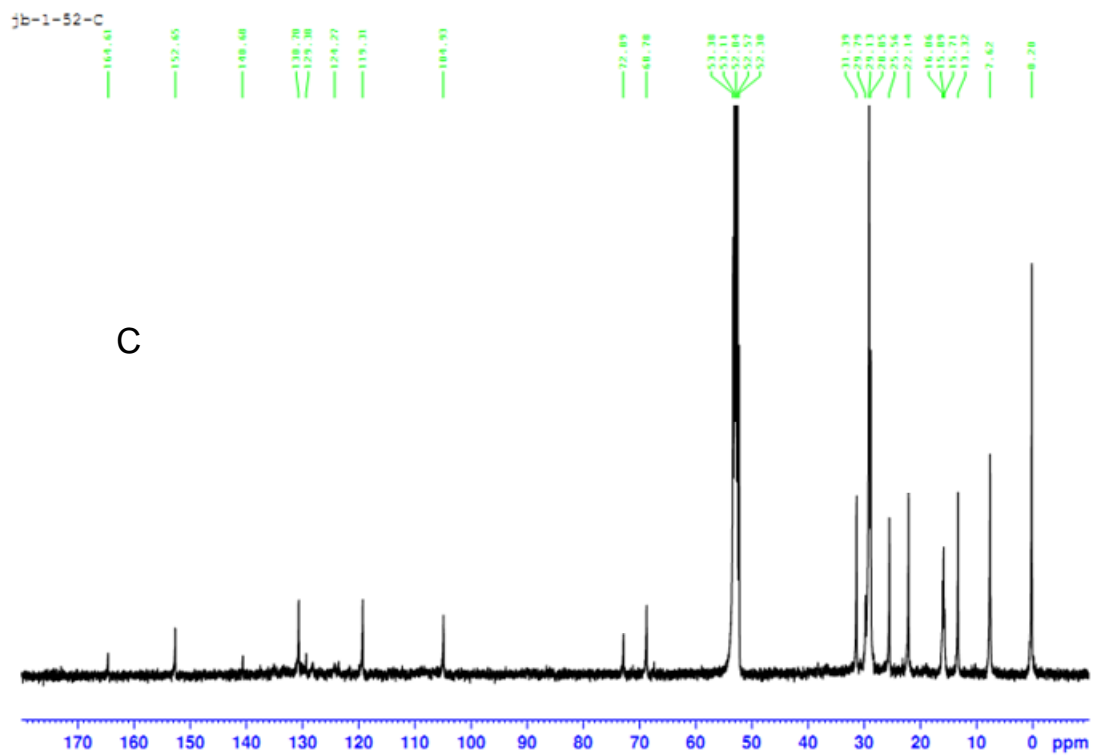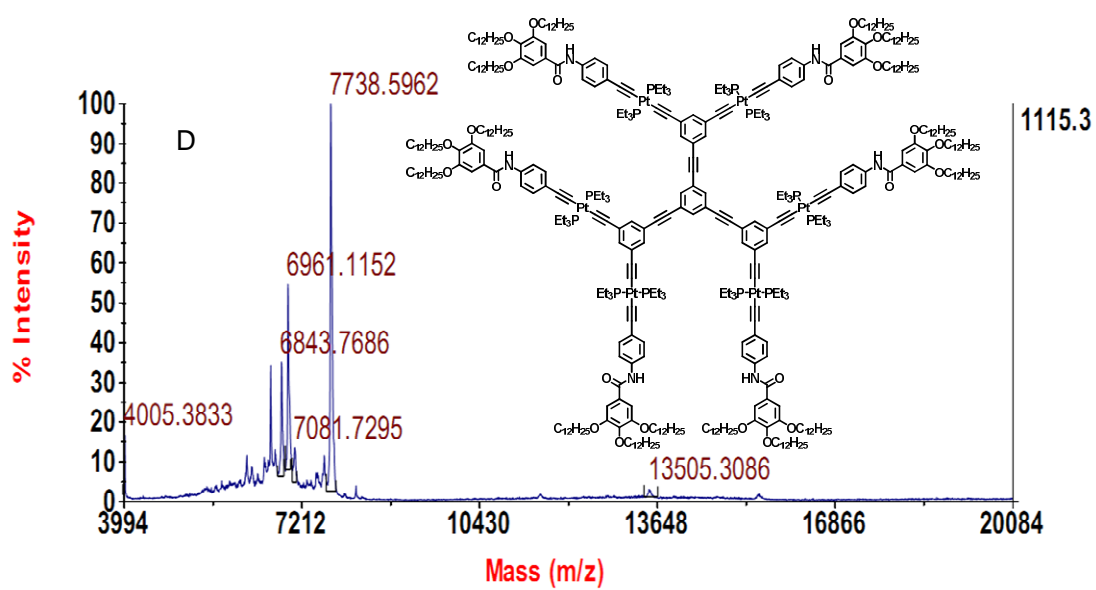

Fig. S23 (A)  $^1\text{H}$  NMR, (B)  $^{31}\text{P}$  NMR, (C)  $^{13}\text{C}$  NMR spectra and (D) MALDI-TOF MS of branched complex **2b** in  $\text{CD}_2\text{Cl}_2$ .

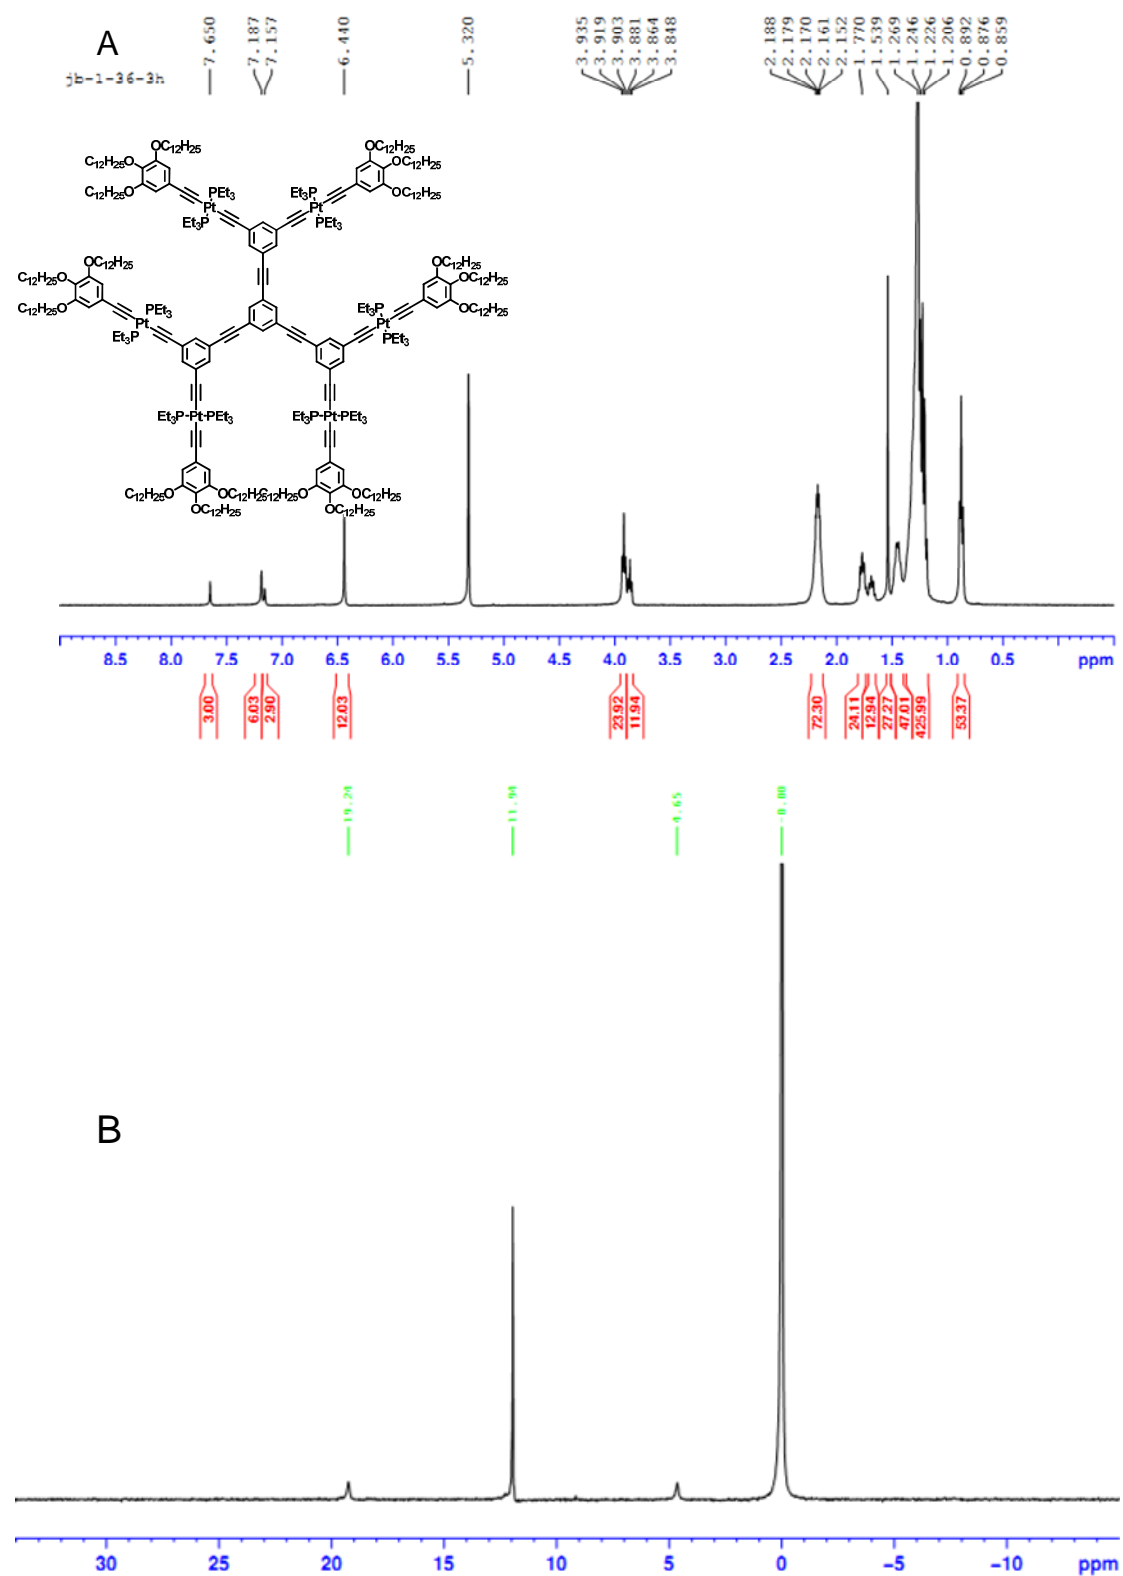



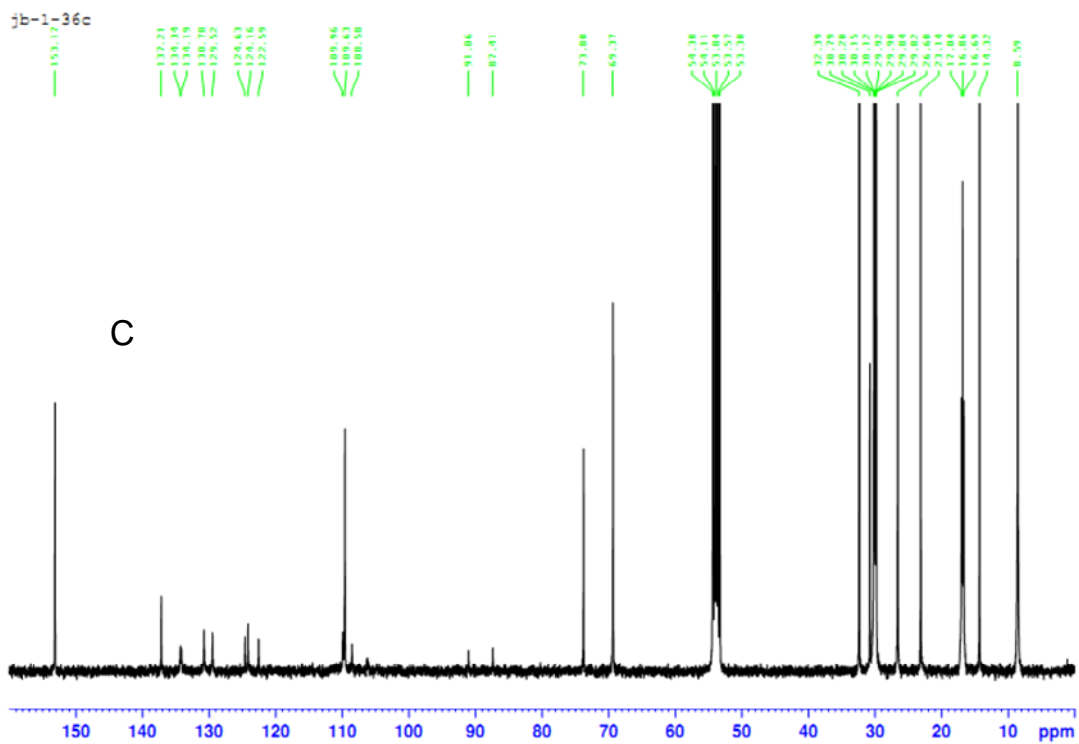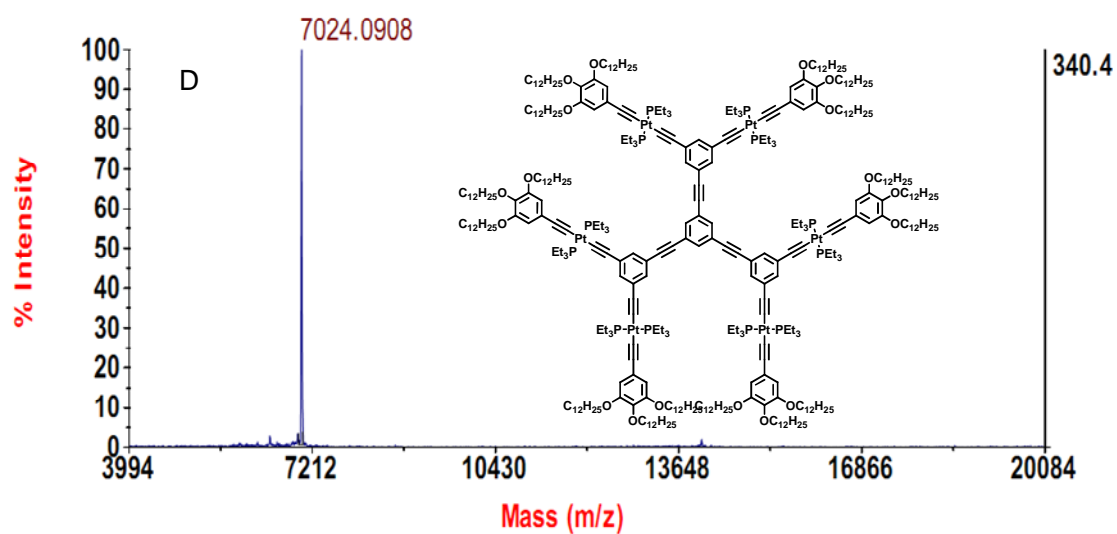

## 9. References

1. S. Diring, F. Camerel, B. Donnio, T. Dintzer, S. Toffanin, R. Capelli, M. Muccini and R. Ziessel, *J. Am. Chem. Soc.*, 2009, **131**, 18177.
2. T. Cardolaccia, Y. Li and K. S. Schanze, *J. Am. Chem. Soc.*, 2008, **130**, 2535.
3. C.-C. Huang, Y.-C. Lin, P.-Y. Lin and Y.-J. Chen, *Eur. J. Org. Chem.*, 2006, 4510.
4. J. Li and P. Huang, *Res Chem Intermed*, 2012, **38**, 403.
